## A metagenomic-based study of two sites from the Barbadian reef system

Simpson S<sup>1-3</sup>, Bettauer V<sup>1-3</sup>, Ramachandran A<sup>1</sup>, Kramer S<sup>1</sup>, Mahon S<sup>5</sup>, Medina M<sup>6</sup>, Vallès Y<sup>7</sup>, Dumeaux V<sup>1,4</sup>, Vallès H<sup>7</sup>, Walsh D<sup>1</sup>, Hallett MT<sup>\*1-3</sup>

<sup>1</sup> Department of Biology

<sup>2</sup> Centre for Applied Synthetic Biology

<sup>3</sup> Department of Computer Science and Software Engineering

<sup>4</sup> PERFORM Centre

Concordia University, Montreal, Quebec, Canada

<sup>5</sup> Coral Reef Restoration Alliance (CORALL), Barbados, West Indies

<sup>6</sup> Department of Biology, Pennsylvania State University, University Park, PA, USA

<sup>7</sup> Department of Biology and Chemical Sciences, University of the West Indies, Cave Hill, Barbados, West Indies

\* [michael.hallett@concordia.ca](mailto:michael.hallett@concordia.ca)

### Abstract

We study the microbiome of sea water collected from two locations of the Barbadian coral reefs. The two sites differ in several environmental and ecological variables including their endogenous benthic community in addition to their proximity to urban development and runoffs from inland watersheds. The composition of the microbial community was estimated using whole genome DNA shotgun sequencing. Although both sites exhibit a similar degree of richness, the less urbanized site (Maycocks reef at Hangman's Bay) is strongly concentrated with phototrophs. In comparison, the more urbanized location (Bellairs Research Institute) is enriched for copiotrophs, macroalgal symbionts and marine-related disease-bearing organisms from taxa scattered across the tree of life. Overall, our samples and associated measurements of chemical and environmental qualities of the water are in line with previous marine microbiome profiles of warm ocean surface waters. This suggests our approach captures salient information regarding the state of each coral reef site and sets the stage for larger longitudinal studies of coral reef dynamics in Barbados.

### Introduction

Coral reefs are fragile ecosystems which house a significant fraction of the planet's biodiversity and serve as the economic foundation to many communities, providing a source of food and a

defense mechanism against extreme meteorological events.<sup>1-5</sup> Tropical coral reef systems require precisely tuned conditions for efficient ecological functionality and survival including clear oligotrophic water<sup>6,7</sup>, a narrow band of water temperatures<sup>8</sup>, larval recruitment from distal origins<sup>9</sup> and continuous nutrient uptake<sup>10</sup>. Tropical coral reef systems in the Caribbean region have been subject to both global and local stressors over the past 50 years, resulting in an 80% loss of coral cover<sup>11,12</sup>. Global stressors include climate change with associated increased sea temperatures and severe storms<sup>1,3,13</sup>, ocean pollutants including plastic waste<sup>14</sup> and ocean acidification<sup>15</sup>.

The reef system studied here, which lies on the west side of Barbados, has witnessed a 70% decline in coral colonies over the past two decades and has suffered two mass bleaching events in 2005 and 2010<sup>11,16-18</sup>. Barbados has also experienced repeated golden tidal events caused by Sargassum seaweed originating from the tropical Atlantic ocean, east of Brazil, which stress the ecosystems via light reduction, oxygen depletion, and by increasing nutrient levels and mortality of associated reef fishes<sup>19,20</sup>. These same reef systems are negatively impacted by several biotic and abiotic local stressors including overfishing<sup>12</sup>, mechanical disturbances from water-based activities, and eutrophication due to agricultural runoffs, sewage, and anthropogenic pollution<sup>11,21,22</sup>.

Since microbiomes influence and reflect the environment they inhabit, an understanding of the natural variability and shifts in community gradients of the coral reef sites may allow for the precise identification of environmental disturbances, in turn suggesting specific prophylactic measures that could be taken to cull negative influences<sup>23-27</sup>. Indices of reef health have been traditionally formed by combining information obtained from physical ecological assessments (tissue damage, coral disease and bleaching)<sup>28,29</sup> and measures of diversity of fish and other reef inhabiting species<sup>30,31</sup>. The status of the Barbados reef system has relied on such methods since 1982 to monitor 43 sites in five-year cycles<sup>17</sup>. The microbial community within the corals and water surrounding these corals has not been studied extensively nor been subjected to high-throughput unbiased molecular profiling. Our goal here is to profile the Barbadian coral reef microbiome and integrate this information within the context of similar efforts led by international consortia to globally profile oceanic microbial communities<sup>8,32-34</sup>.

These efforts exploit the power of high throughput metagenomics sequencing in order to characterize coral reef systems, and show how features change due to biotic and abiotic influences, unravelling key links to environmental variables<sup>27,35</sup>. The characterization of the microbiomes across varying ecological, environmental and geophysical properties in Barbados represents a first step towards the identification of molecular biomarkers of reef health progression and adaptation, and also towards identifying interventions for coral reef restoration.

## Results

The two reef sites differ in a range of ecological, environmental and chemical metrics.

The Bellairs reef lies off the west (Caribbean) coast of Holetown, a densely populated area of the island with tourism and other urban infrastructure<sup>36</sup>. It is subject to several runoffs originating from an inland watershed<sup>37</sup>. The Bellairs reef lies within the Barbados (Folkestone)

Marine Reserve and is protected from fishing and vehicle traffic, although still subject to high recreational activity. The Maycocks reef also lies off the west coast but in a sparsely populated area with no coastal urban development but a small residential community inland<sup>36</sup>. Whereas the Bellairs site is the back reef zone of a fringing coral reef directly adjacent to the shore in shallow water (~10 m), Maycocks is a bank reef located in deeper water (~15m) approximately 1.5 km from shore (**Figure 1A-C**). The benthic composition at both sites was determined after both recent bleaching events but two years previous to this study<sup>11</sup>. In comparison with Bellairs, Maycocks exhibits a higher abundance of corals, a more uniform distribution of species, significantly more hard corals, less filamentous algae, a lower average percentage of dead corals and greater average fish biomass (**Table 1A**). Water samples were collected from both sites ~1m above each reef, and sequentially filtered to concentrate organisms between 3 $\mu$ m and 0.22 $\mu$ m in line with Tara Oceans parameters<sup>33</sup>. We measured several chemical and environmental parameters and observed that Maycocks had a significantly greater level of dissolved oxygen and lower level of nitrate (NO<sub>3</sub>; **Table 1B, Methods 1,2**). We also estimated the number and size of microbes present in our samples using microscopy (**Methods 2**) and observed that overall both sites had approximately the same number of organisms per mL<sup>3</sup>, but that Maycocks has a tendency towards smaller organisms compared to Bellairs (**Supplemental Figure 1**).

Whole genome sequencing of the microbiome of reef water from the two sites.

DNA was extracted and whole genome shotgun sequenced (NovaSeq 2 x 150bp, Illumina Inc., **Methods 3,4**). The resultant paired-end reads were first processed by our bioinformatic pipeline for read trimming, quality control (**Methods 5**). The Kraken2<sup>38</sup> and Bracken<sup>39</sup> packages were then used to align the reads against a compendium of databases from the microbial subset of the NCBI<sup>40</sup> and Mar marine reference database<sup>41</sup> in order to estimate taxa abundances (**Methods 6**). Read counts from both sites were mapped to nodes of the tree of life created using the NCBI Taxonomy database<sup>42</sup> (**Methods 7**).

Reads mapped to non-microbial taxa were removed from the dataset, but we note that analysis of reads mapped to Metazoa, Embryophyta and multicellular fungi identified marine and terrestrial species indigenous to Barbados and ornamental plants and crops grown along the coast (**Supplemental Information 1**). The final microbial metagenomic dataset after filtering and quality control consists of 4.5M and 9.2M reads at Bellairs and Maycocks respectively (**Table 1C**). In total, the profiles identified 2415 (Bellairs, B) and 2479 (Maycocks, M) genera and 9089 (B) and 9461 (M) species. Convergence to these numbers occurs when the read data is downsampled to just one-third of the total dataset, and other measures of ecological richness failed to predict any additional taxa at either site (**Supplemental Information 2**). We built linear models to adjust abundance measures relative to genome size (**Supplemental Information 3**).

Maycocks exhibits a relative enrichment of Bacteria and Chlorophyta whereas Bellairs contains more eukaryotic (primarily fungal) and archaeal taxa (**Figure 1D**). All of these differences are significant ( $p \ll 0.01$ , Pearson's  $\chi^2$ , **Methods 8a**). This global breakdown is consistent with the Tara Oceans 2009-2013 project<sup>8,33,43</sup> which did not sample in the vicinity of Barbados: ~81% of all reads were mapped to Bacteria and 3% of all reads as Archaea in both

| A. Benthic community      |       |       | B. Chemical and Environmental        |                     |                     | C. Sequencing parameters |        |        |
|---------------------------|-------|-------|--------------------------------------|---------------------|---------------------|--------------------------|--------|--------|
|                           | Bell. | May.  |                                      | Bell.               | May.                |                          | Bell.  | May.   |
| Gorgonians                | 0.14  | 0.83  | Dissolved Oxygen (%) *               | 89.73<br>(sd 0.95)  | 95.30<br>(sd 0.2)   | Paired end reads         | 18.6M  | 29.1M  |
| Hard Coral                | 15.85 | 26.94 | Dissolved Oxy. (mg/L) *              | 5.68<br>(sd 0.08)   | 6.04<br>(sd 0.03)   | Reads classified         | 7.4M   | 13.1M  |
| Sponges                   | 11.50 | 20.99 | Salinity (ppt)                       | 35.03<br>(sd 0.48)  | 34.78<br>(sd 0.60)  | Metazoan reads           | 1.7M   | 2.3M   |
| Filamentous algae         | 54.84 | 26.86 | Temp (°C)                            | 29.03<br>(sd 0.01)  | 29.13<br>(sd 0.05)  | Embryo-phyta             | 1.1M   | 1.6M   |
| Coralline algae           | 13.32 | 22.48 | Nitrate (NO <sub>3</sub> ) (mg/L) ** | 1.78<br>(sd 0.35)   | 1.06<br>(sd 0.21)   | Microbial reads          | 4.5M   | 9.2M   |
| Sand Rubble               | 4.0   | 0.99  | Nitrite (NO <sub>2</sub> ) (mg/L)    | 0.018<br>(sd 0.005) | 0.013<br>(sd 0.003) | Taxa                     | 14.64K | 15.15K |
| Filamentous cyanobacteria | 0.21  | 0.83  | Phosphate (PO <sub>4</sub> ) (mg/L)  | 0.070<br>(sd 0.036) | 0.078<br>(sd 0.08)  | Genera                   | 2415   | 2479   |
| Zoanthid                  | 0.14  | 0.08  | Turbidity (NTU)                      | 6<br>(sd 2.65)      | 7<br>(sd 1.00)      | Species                  | 9089   | 9461   |

**Table 1. Comparison of the Bellairs and Maycocks sites across different parameters sets. A.** The benthic composition of the Bellairs and Maycocks Reef based on the percentage cover of major benthic categories on the substratum (from Oxenford and Valles, 2016). **B.** Measurements of several environmental and chemical variables. The \* and \*\* denote significance at  $p < 0.01$  with a t-test and Wilcoxon test respectively. **C.** Results of the whole genome shotgun metagenomic sequencing.



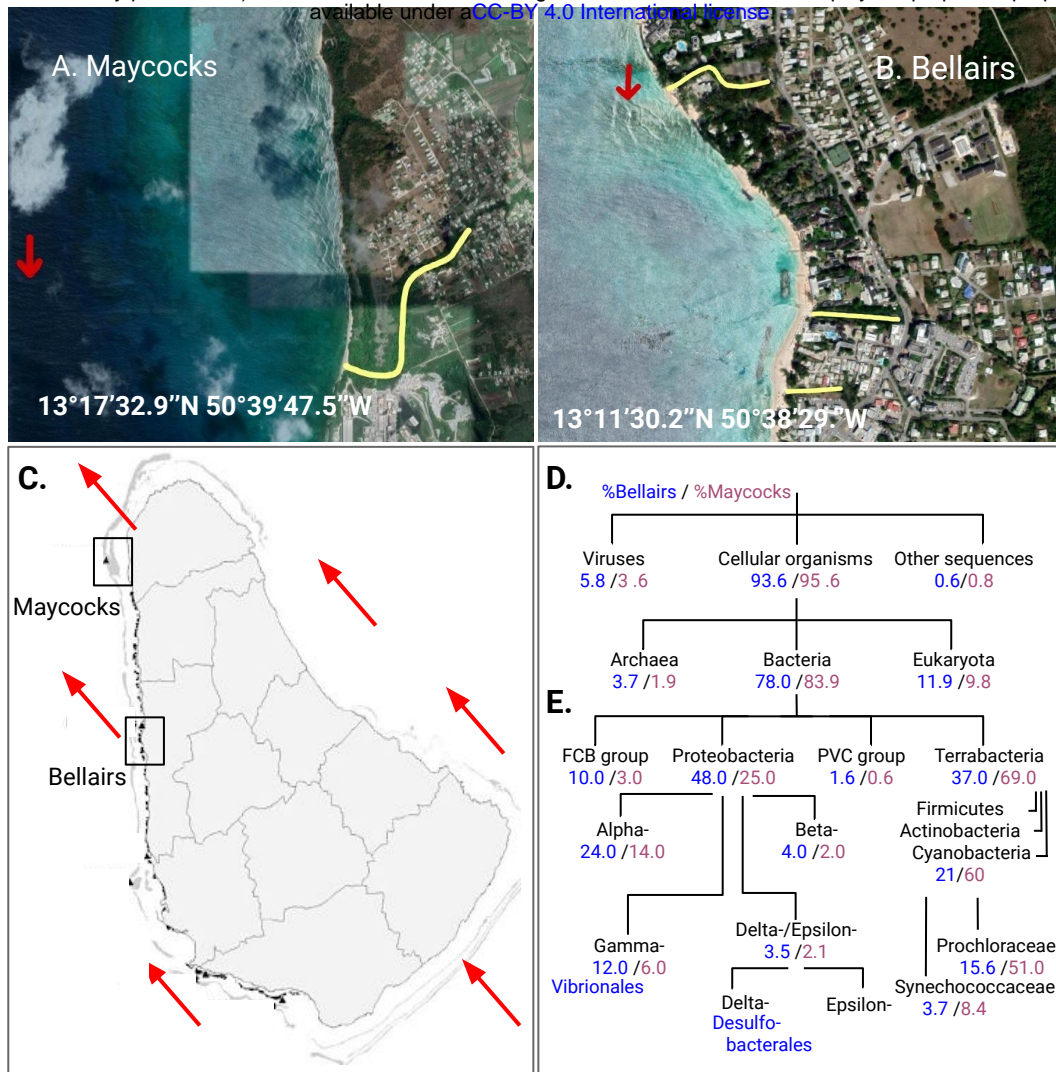

**Figure 1** Aerial view of the Maycocks (A) and Bellairs (B) sites with surrounding areas. Yellow denotes runoffs. Red arrows denote sampling sites. C. Map of Barbados with the sea current direction (red). D. Percentage of total read counts at the root of the tree of life after removing contaminants. E. The subtree of Bacteria.

datasets. They diverge for viruses (7.5% Tara vs 4.7% Barbados) and Eukaryota (4.6% Tara vs 10.9% Barbados)<sup>33</sup>.

#### Bellairs is enriched for bacteria involved in recycling of organic matter

There was evidence for 6,279 species at Bellairs and 6,459 species at Maycocks across 1,434 distinct bacterial genera, although the distribution in abundances differs significantly between the sites (**Figure 1E, Figure 2A**). Bellairs is enriched in gram negative Proteobacteria (48% B vs 25% M) and the Fibriobacteres-Chlorobi-Bacteroidetes (FCB) group (10% B vs 3% M) where Maycocks has a strong preference for the Terrabacteria group (37% B vs 69% M). These differences are all highly significant ( $p \ll 0.01$ , **Methods 8a-c**). **Figure 2A** (and **Supplemental Figure 8**) establishes that the majority of differentially abundant genera correspond to Proteobacteria and Terrabacteria.

Within the PVC group, the Planctomycetes were more prevalent at Bellairs than Maycocks (Kruskal-Wallis KW,  $p \ll 0.01$ , **Methods 8c**) with the genus *Rhodopirellula* exhibiting differential abundance. *Rhodopirellula* is a widely distributed marine genus that plays an important role in global carbon and nitrogen cycling<sup>44</sup>. *Mariniblastus fucicola* and other microbiota associated with coral degradation and algae cover are enriched at Bellairs<sup>45</sup>.

With respect to the FCB group, Bacteroidetes are significantly enriched at Bellairs (8.2% B vs 2.8% M, KW,  $p \ll 0.01$ ). These gram-negative non-spore forming bacteria are often detected in the gut of animals, and also seawater, where they degrade polymeric organic matter.

Maycocks showed a significant enrichment of the genera *Candidatus Actinomarina*, ultra small free living species that perform photoheterotrophic metabolism and mirror similar geographic distributions to picocyanobacteria species<sup>46</sup>. However, many other Actinobacteria are commonly found in the soil of marine ecosystems where they play a role in recycling refractory biomaterials and perform nitrogen fixation in symbiosis with plants<sup>47</sup>. Such Actinobacteria are enriched at Bellairs including *Illumatobacter coccineus* and *Arthrobacter* sp. LS16.

#### Maycocks is highly enriched for phototrophic Terrabacteria

Terrabacteria is the most discordant of all taxa between the two sites (37% B vs 69% M). The vast majority of the Maycocks Terrabacteria reads are mapped to Cyanobacteria (60 of 69%; **Figure 1E**). Cyanobacteria are phototrophic bacteria that synthesize organic compounds from carbon dioxide, and produce oxygen as a by-product. They are extremely abundant in nutrient-poor warm waters. In our data, the autotrophic genera *Prochlorococcus* and *Synechococcus* account for over 98% of all Cyanobacteria identified in our study (**Figure 2A**), consistent with the oligotrophic nature of the Barbadian marine environment<sup>48</sup>. *Prochlorococcus* is typically more prevalent in nutrient poor water while *Synechococcus* is more prevalent in eutrophic water and coastal plumes of rivers, likely due to increased nitrate and phosphate levels<sup>49</sup>. This is consistent with our data where we observe a 3.7:1 *Prochlorococcus* to *Synechococcus* ratio at Bellairs, but a 5.3:1 ratio at Maycocks. A study of the coral reef ecosystems in the Caribbean waters of Curaçao also reported a high percentage of Cyanobacteria (30-43%), well beyond levels observed in the north Atlantic Ocean, Mediterranean



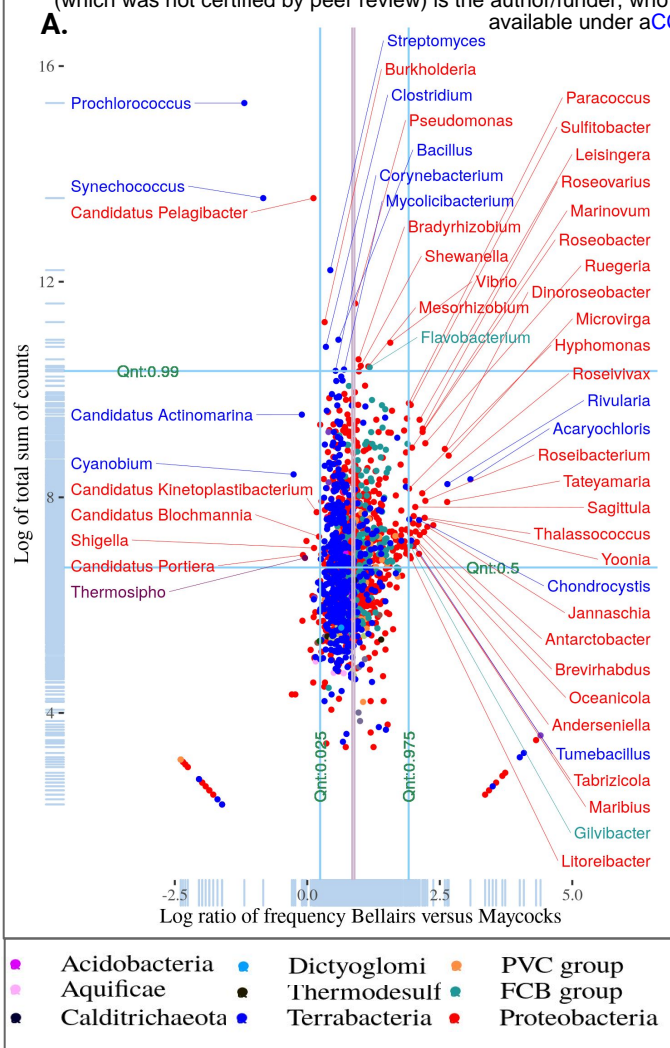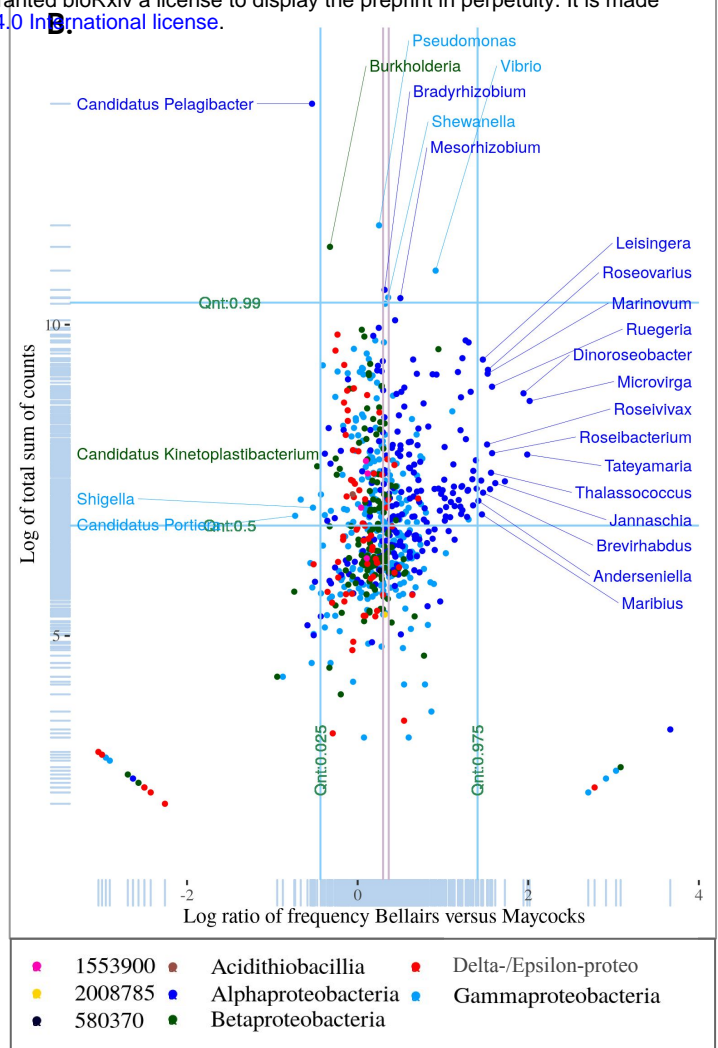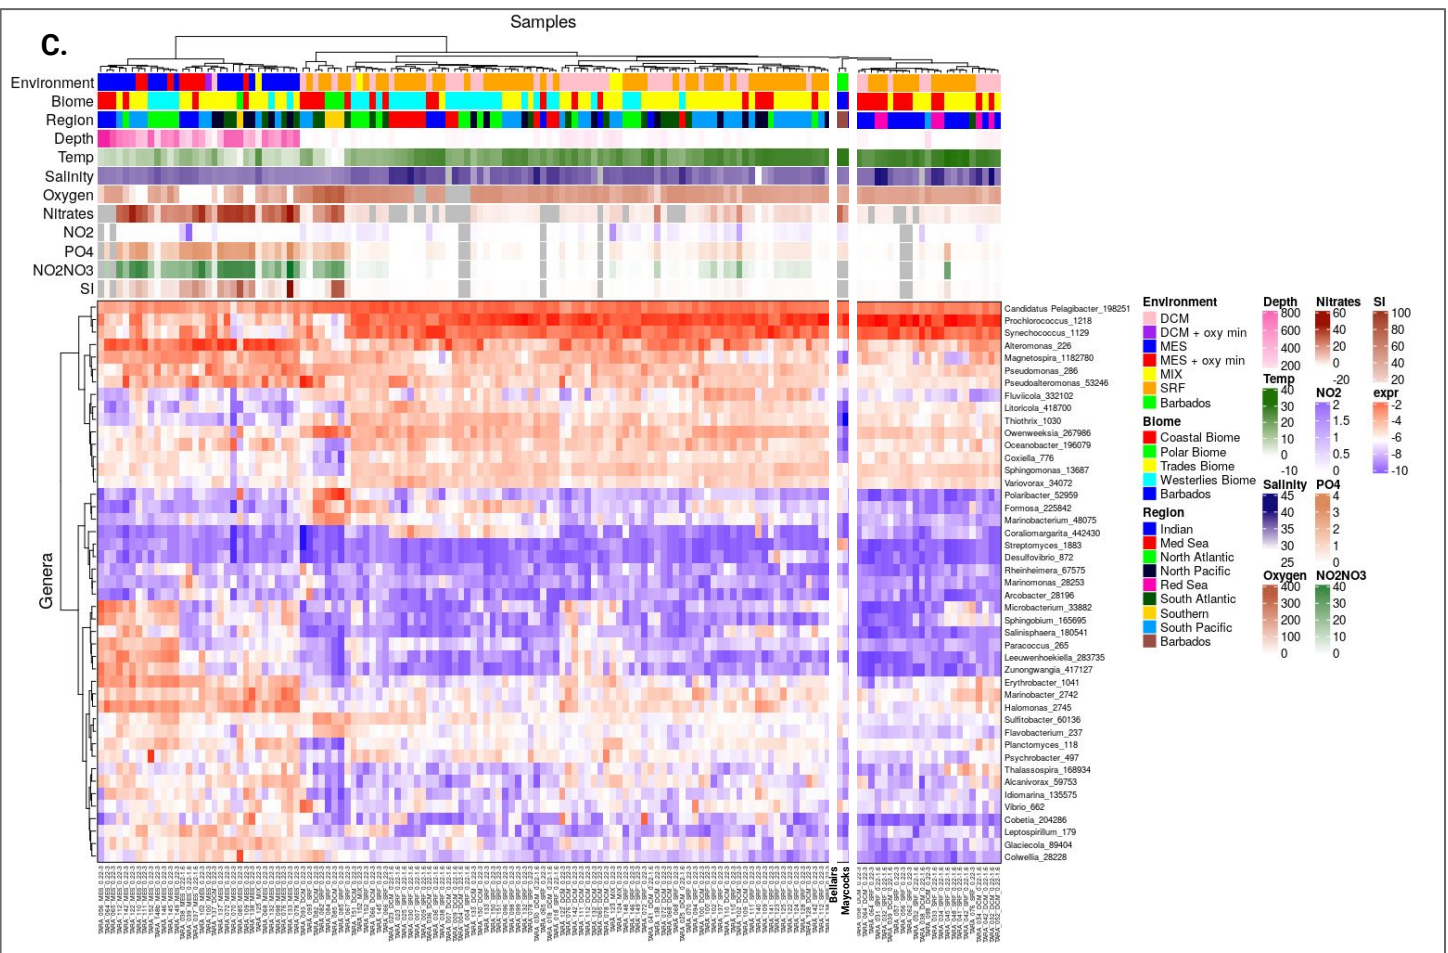

**Figure 2 A.** The log ratio of the fraction of all bacterial reads at Bellairs versus the fraction of all bacterial reads at Maycocks across all genera within the Bacteria superdomain. **B.** Analogous to panel A except here attention is restricted to genera within Proteobacteria. **C.** A heatmap of relative abundance of individual species, and associated measures of ecological diversity, and physio-chemical-hydrographic attributes integrating the Barbadian coral reef profiles with the Sunagawa et al. Tara Oceans data.

Sea and Pacific Ocean<sup>50</sup>. Moreover, a recent study of northern Caribbean reef systems also highlighted high abundance of Cyanobacteria among their sites with a relative abundance ranging from 13.2% to 29.7% of all bacterial and archaeal phyla, again primarily due to the presence of *Prochlorococcus* and *Synechococcus*<sup>25</sup>. Our observed frequencies for Cyanobacteria at Maycocks are significantly more extreme.

The remainder of Terrabacteria show enrichment at Bellairs including the Firmicutes, an extremely diverse group of endospore-forming bacteria able to survive in extreme environments and often found in nutrient-rich environments including marine sediment<sup>51</sup> (**Supplemental Figure 9**). Several genera were more abundant at Bellairs including the *Tumebacillus* (gram-positive spore forming sulphur-oxidising bacteria that have been isolated from diverse environments such as algal scum, freshwater, soil and mangroves<sup>52</sup> and within the skeletal mucus of Caribbean coral porites<sup>53</sup>) and the *Fictibacillus* (aerobic bacteria of which some species possess protease-producing abilities that play a major role in the biodegradation of corals<sup>54</sup>).

Bellairs is enriched for Alphaproteobacteria associated with algae and ocean sediment

Alpha- and Gamma-proteobacteria are believed to contribute the majority of bacterioplankton to ocean waters, an observation consistent with the relative abundances in our data (Alphaproteobacteria 24% Bellairs vs 14% Maycocks, Gammaproteobacteria 12% Bellairs versus 6% Maycocks; **Figures 1E**). The shift towards Bellairs is significant in both cases (KW and Dunn's test,  $p \ll 0.01$ , **Methods 8c, Figure 2B**).

Rhodobacterales can utilize various organic and inorganic compounds and carry out sulfur oxidation, aerobic anoxygenic photosynthesis, carbon monoxide oxidation and the production of secondary metabolites; there is evidence that members of Rhodobacterales correlate with the sedimentary setting<sup>55</sup> (**Supplemental Figure 10**). Although some Rhodobacteraceae bacterium strains were highly abundant and biased towards Maycocks, the vast majority of genera showed a general trend towards the Bellairs site (KW test,  $p \ll 0.01$ ) highlighting genera *Dinoroseobacter*, *Tateyamaria* and *Jannaschia*. *Dinoroseobacter* are aerobic anoxygenic phototrophic bacteria, known to be highly abundant in marine turf algae. Some *Dinoroseobacter* species form epibiotic relationships with red tide dinoflagellates<sup>56</sup>. *Tateyamaria* is a genus of marine gram-negative aerobic bacteria isolated from coastal marine environments. *Tateyamaria* have been identified as components of soft corals and coralline alga microbiomes. Within the alga microbiome, *Tateyamaria* species are able to survive and increase abundances under acidification conditions<sup>57</sup>. *Jannaschia* are aerobic anoxygenic phototrophic bacteria. Some species play a role in transport and nitrate reduction<sup>58</sup>. Other species appear to be part of microbial communities associated with corals<sup>59</sup>.

Conversely, the oligotrophic genus *Candidatus Pelagibacter* is significantly shifted towards Maycocks (KW test,  $p \ll 0.01$ ). These small free-living heterotrophic species, which are one of the most abundant genera identified in our study, are usually found thriving in low-nutrient environments, which play a significant role in carbon cycling, feeding on dissolved organic carbon and nitrogen<sup>60,61</sup>. The species *Candidatus P. ubique* belongs to the SAR11 clade ubiquitous in the world's oceans<sup>61</sup>.

### Bellairs is enriched for pathogens of many dimensions of the reef biosystem

Within Gammaproteobacteria, the genus *Vibrio* was one of the most highly abundant genera in our dataset and exhibits a strong skew towards Bellairs (KW,  $p < 0.01$ ) involving many species including *corallilyticus*, *tubiashii*, *harveyi*, *astriarenae*, *nigripulchritudo*, and *ponticus* (**Supplemental Figure 11**). *Vibrio* are gram-negative motile bacteria commonly found in marine environments and are facultative anaerobes, capable of producing ATP by aerobic respiration if oxygen is present, but also able to switch to fermentation. Some *Vibrio* species play a significant causative role in coral diseases and disrupt corals symbiotic relationship with zooxanthellae. There are indications that high nutrient levels promote pathogenic bacteria including *Vibrio* spp. to dominate in healthy coral reef systems<sup>62</sup>. In our data, there was evidence for several *Vibrio* species at Bellairs including *V. corallilyticus* (implicated in white band syndrome) and *V. harveyi* (linked to yellow spot syndrome but also present in healthy corals albeit less frequently<sup>63</sup>), *V. tubiashii* (implicated in shellfish vibriosis and may also be a virulence factor in diseases of scleractinian corals, where it plays a role in photoinactivation of the coral<sup>64</sup>), *V. astriarenae* (a generalist in many reef systems<sup>65</sup>), *V. nigripulchritudo* (a shrimp pathogen with major impact on farms in Japan and New Caledonia<sup>66</sup>), and *V. ponticus* (a fish pathogen<sup>67</sup>). *Photobacterium*, also a genus of Vibrionales, is common in marine environments and can survive in both aerobic and anaerobic environments. *P. damsela*, which was more abundant at Bellairs, is a well-studied pathogen of marine organisms including fish and has made significant negative financial impact on fisheries world-wide<sup>68</sup>. Two species of the genus *Acinetobacter* within Pseudomonadales are enriched at the Bellairs site. *Acinetobacter* is a gram-negative genus which plays an important role in the mineralization of aromatic compounds within soil including marine systems, and many species can reduce nitrates to nitrites<sup>69</sup>. Our study highlights *A. schindeleri* and *A. indicus*, both emerging opportunistic human pathogens that can survive in many environments<sup>70</sup>.

In contrast, the most differentially abundant at the Maycocks site are several unclassified Gammaproteobacteria including members of the SAR86 clade, which are globally abundant planktonic bacteria<sup>71</sup>.

### Bellairs is enriched for sulfate reducing Deltaproteobacteria

The Delta-Epsilon subdivision displays a dramatic split in their preference between the two sites (**Supplemental Figure 12**). Epsilon members are skewed towards Maycocks (KW test,  $p < 0.01$ ) but lie close to the 95% confidence interval for the global mean (red bars). The vast majority of Deltaproteobacteria are skewed towards Bellairs including the *Desulfomicrobium*, a genus of sulfate reducing bacteria that thrive in marine anoxic environments and interfaces such as microbial mats<sup>72</sup> including the species *D. orale* which has been previously identified in Atlantic coastal marine waters<sup>73</sup>. Several SAR324 species are highly abundant with a preference for Maycocks. They have a versatile metabolism with heterotrophic carbon utilization capabilities and are implicated in sulfur oxidation<sup>74</sup>.



Maycocks is a lithotrophic hotspot and Bellairs is similar to other warm ocean waters

We compared our profiles with the Tara Oceans effort which generated 243 samples from 68 locations in epipelagic and mesopelagic waters restricted to only bacterial taxa (n=139, **Methods 9**)<sup>33</sup>. **Figure 2C** directly compares our results with Sunagawa et al.<sup>33</sup> across several types of variables including measures of ecological diversity, physio-chemical-hydrographic attributes and relative abundances of individual species. Here we used unsupervised clustering to investigate how our sites compare across the global sites sampled by Tara Oceans. Bellairs and Maycocks co-cluster with other samples harvested from the surface and deep chlorophyll maximum layers (SRF, DCM respectively, **Figure 2C**) of the trade and coastal biomes. This is consistent with the finding from Sunagawa et al. that depth is the single most important factor that determines species abundance as it explains 75% of variation via Principal Coordinate Analysis. Both Bellairs and Maycocks are closest to Red Sea and Indian Ocean samples. Although concentrations of nitrates NO<sub>2</sub> and PO<sub>4</sub> at Maycocks are similar to levels observed in samples it co-clusters with, nitrate levels of Bellairs are higher and more similar to mesopelagic layers (MES in **Figure 2C**).

Abundance levels across the selected genera are generally consistent with the Tara Ocean data. The right subtree of **Figure 2C** is enriched for autotrophs consistent with the fact that Barbados is a hot climate with oligotrophic waters. However, several genera were under-represented at both locations in comparison to Tara Oceans. This includes Magnetospira, Litoricola, Thiothrix, Owenweeksia, Oceanobacter and Coxeilla. Conversely, Streptomyces at Bellairs was an outlier exhibiting an abundance higher than all other samples.

Both sites exhibit high levels of methane producing anaerobic Archaea

In total, there was evidence of 440 species at Bellairs and 442 species at Maycocks across 122 distinct archaeal genera. A high percentage of all archaeal reads were mapped to Euryarchaeota at both sites, although there is a significantly higher fraction at Maycocks (63% B vs 82% M; **Figure 3A**). For both sites, the second highest fraction of archaeal reads were mapped to the TACK (Thaumarchaeota, the ancestor of the Cren-, Cand. Bathy- and Cand. Kor-archaeota) group, although here there is a significantly higher fraction at Bellairs (32% B versus 13% M). These differences are all significant (p << 0.01, **Methods 8**).

Several genera from Methanomada groups are highly abundant in equal proportions at both sites (**Figure 3C**). The Methanosarcina genus contains anaerobic methanogens that conduct methanogenesis in diverse environments throughout the world including seawater and in coral rubble<sup>75</sup>. Methanobrevibacter is a genus of methane producing anaerobic archaea. Some known species of this genus inhabit animal intestinal tracts, decaying plants and sewage and are used as indicators of faecal pollution in coastal waters<sup>76</sup>. Methanocella species are known soil and sediment archaeons<sup>77</sup>. Several genera however including Methanoplanus and Methanoshpaerula have significantly higher relative abundance at Maycocks. This genus contains methanogenic species that are known to play endosymbiotic roles with marine ciliates<sup>78</sup> and other species associated with sponges in anoxic environments<sup>79</sup>.



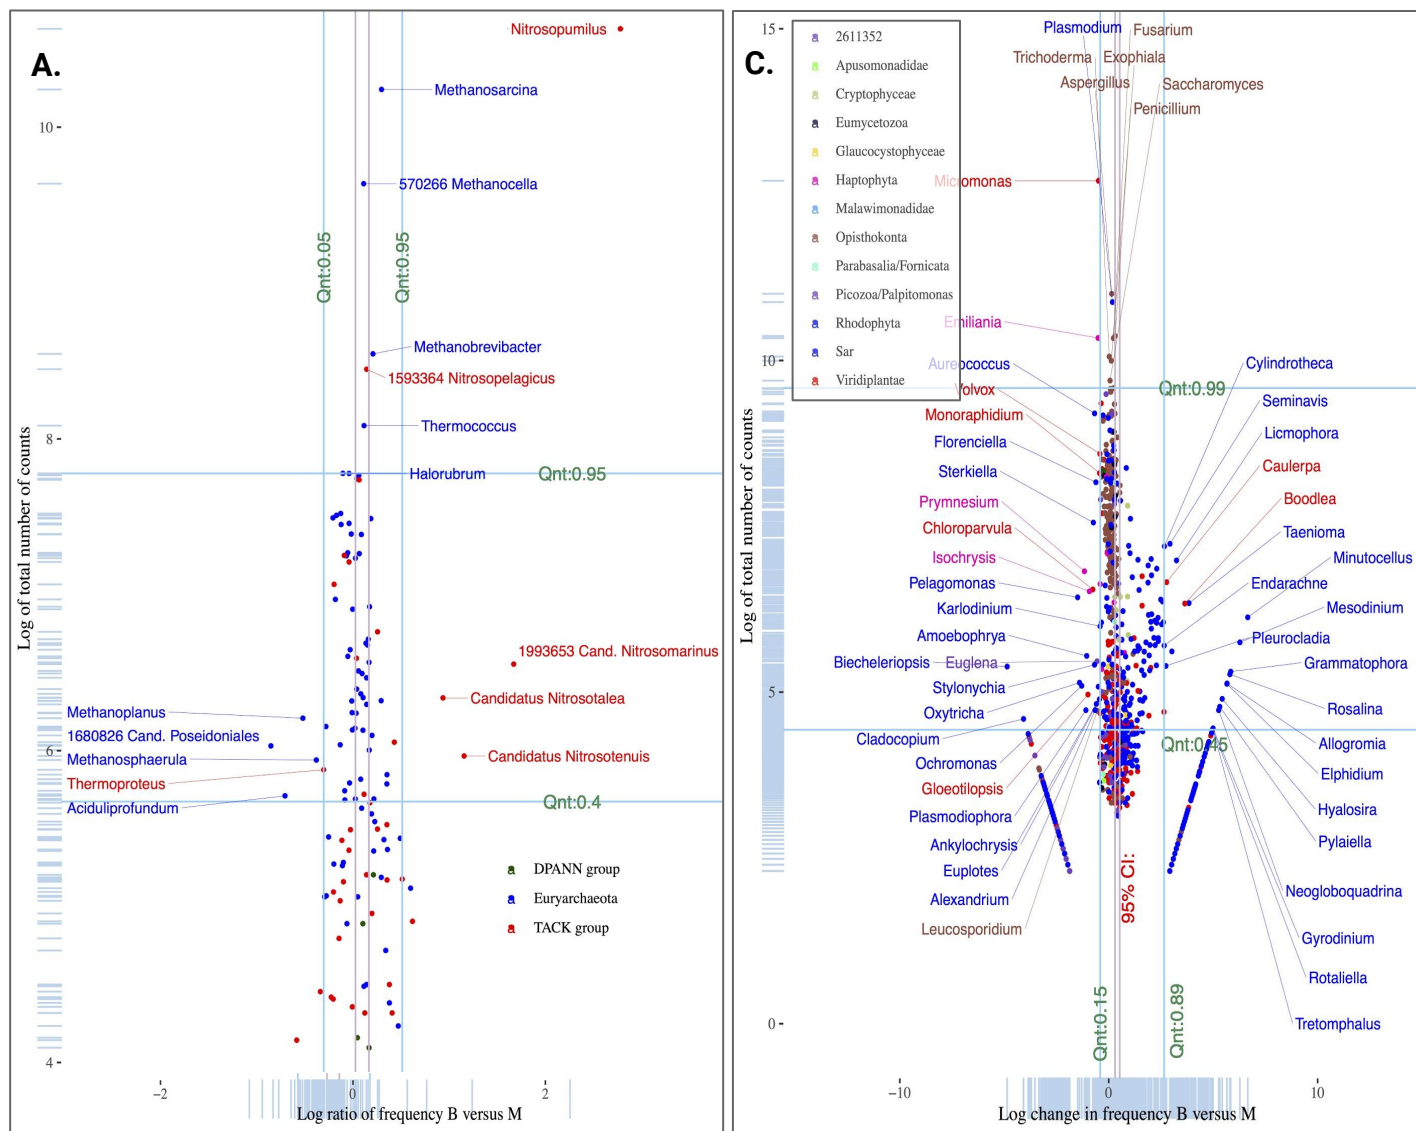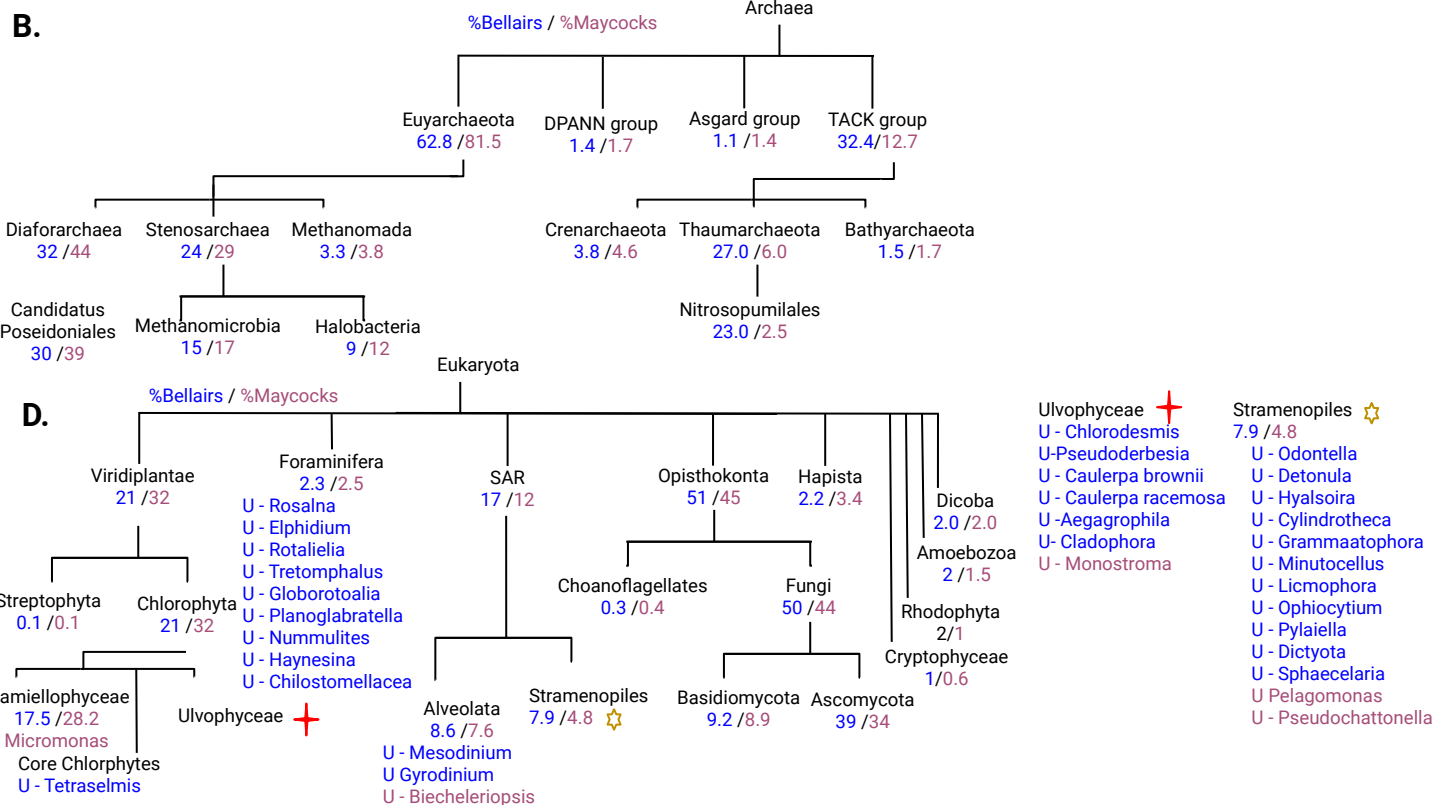

**Figure 3 A.** Analogous to the plots 2A,B but here focus is restricted to Eukaryota. **B.** Percentage of total read counts for abundant sub-taxa of Eukaryota. **C.** The scatterplot for Archaea. **D.** Percentage of total read counts for abundant sub-taxa of Archaea.

### Photoheterotrophic euryarchaeota are highly enriched at Maycocks

The majority of Euryarchaeota reads at Maycocks are mapped to Diaforarchae with smaller amounts mapping to the Stenosarchaea group (24% B vs 29% M), and Methanomoda (**Figure 3 A,C**). Species from the Candidatus Poseidoniales order are some of the most abundant planktonic archaeons in ocean surface waters<sup>80</sup>, consistent with the elevated relative abundances in our data. The ancestor of Cand. Poseidoniales is a motile photoheterotroph, capable of degrading proteins and lipids, although there is genus-specific lifestyle and niche partitioning<sup>80</sup>.

### Bellairs is enriched for thaumarchaeota involved in nitrification

The majority of Thaumarchaeota reads at Bellairs are mapped to the Nitrosopumilales order (23% B versus 3% M, Dunn's test,  $p \ll 0.01$ ; **Figure 3C**). Nitrosopumilus are ammonia-oxidizing archaeons commonly found in marine environments<sup>81</sup>. The chemolithoautotrophic Nitrosopumilus maritimus species, which is enriched at the Bellairs site, has been established as a dominant contributor to nitrification<sup>75</sup>. Several additional Nitrosopumilales genera are also differentially identified between Bellairs and Maycocks including Candidatus Nitrosopelagicus, a planktonic pelagic ammonia-oxidizing thaumarchaeon involved in nitrogen and carbon fixation in marine environments<sup>82</sup>.

### Maycocks is highly enriched in photosynthetic autotrophic Chlorophyta

The two sites identified a similar percentage of Eukaryota of which approximately half are Opisthokonta, specifically Fungi (**Figure 3B**). Although several "true yeasts" saccaryomyceta are highly abundant, we did not observe a preference for either site. Viridiplantae exhibits an enrichment at Maycocks (21% B vs 32% M) with 99% of these reads mapping to the autotrophic green algae Chlorophyta (**Figure 3D**). This includes Micromonas pusilla and commoda which are photosynthetic picoeukaryotes known to thrive globally in tropical marine environments<sup>83</sup> and play a key role in the primary production within the euphotic zone<sup>84</sup>. These findings are consistent with a recent Caribbean study highlighting Micromonas<sup>85</sup>.

Boodlea composita, which is abundant at the Bellairs site, is a common green algae in coastal marine environments<sup>86</sup>. These macroalgae are capable of blooms forming dense turf or mats in nutrient rich waters. B. composita growths have been observed to smother coral colonies<sup>87</sup>. Species of the genus Caulerpa were present only at Bellairs. Overall the three species had low abundance, although C. brownii was witnessed by just over 200 reads. Caulerpa is a genus of nitrophilic macroalgae that commonly inhabit tropical marine environments including Caribbean coral reefs<sup>88</sup>. Like B. composita, some species can bloom creating carpets which smother coral colonies<sup>89</sup>. Caulerpa species assimilate nutrients from sediment and grow successfully in habitats with anthropogenic disturbance such as waste and stormwater<sup>90</sup>.

Maycocks is enriched for organisms involved in primary production and regulation of the micro-planktonic community

The Stramenopiles-Alveolates-Rhizaria (SAR) supergroup, which we winnowed for single cellular organisms, exhibits broad heterogeneity, contributing outlying species and genera at both sites (**Figure 3D, Supplemental Figure 13**). Several species of the SAR supergroup species are more highly abundant at Maycocks. Genus *Pelagomonas* is monotypic containing only the picoplankton *P. calceolata*, a tiny photosynthetic flagellated alga that contributes to primary production in marine environments<sup>91</sup>. *Biecheleriopsis* contains small marine phototrophic planktonic dinoflagellates that play a role as primary producers and symbiotic partners<sup>92</sup>. *Karlodinium* are phytoplanktonic coastal dinoflagellate mixotrophs that rely on both photosynthesis and phagotrophy and can cause toxic algal blooms when nutrients are scarce within their environments<sup>93</sup>. *Euglena* species are heterotrophic primary producers within marine ecosystems<sup>94</sup>. *Alexandrium* is a genus of planktonic dinoflagellates that contribute to primary production<sup>95</sup>.

Other species and genera biased towards Maycocks are regulators of the micro-planktonic community or have symbiotic roles with coral and sponges. These include for example the *Stylonychia*<sup>96</sup>, *Amoebophrya* (marine parasitic dinoflagellates that inhabit coastal water<sup>97</sup>), the golden algae *Ochromonas* (small unicellular mixotrophic flagellates that play a key role in regulating bacterial abundance<sup>98</sup>), the dinoflagellates of *Cladocopium* (that establish endosymbiosis with cnidarian species such as coral<sup>99</sup>), *Cladocopium* species (dominant symbionts of some stony corals within the Caribbean including Barbados<sup>100</sup>), and *Euplotes* (filter-feeding ciliates linked to the ingestion of coral tissue<sup>101</sup>) (**Figure 3C**).

Bellairs is enriched for benthic epiphytes growing on coral and algae

Many species of Stramenopiles are observed uniquely at Bellairs (**Figure 3D** denoted by orange star, 11 of all 34 uniquely identified organisms identified at Bellairs, hypergeometric binned by eukaryotic phyta,  $p < 0.01$ ). This is not likely due to the depth of sequencing alone given that Maycocks received 1.57 fold more reads than Bellairs and given our downsampling experiments described earlier.

Several marine diatoms were identified including *Licmophora* (common epiphytes abundant on substrates such as filamentous algae or corals where they can form mats which smother coral<sup>102</sup>); *Cylindrotheca* (ubiquitous in coastal areas worldwide that utilize latent nitrogen and phosphorus nutrients in the environment<sup>103</sup>); *Seminavis* (often associated with seaweed living within coral reef ecosystems<sup>104</sup>); *Minutocellus* (specifically species *M. polymorphus*, a symbiont of benthic Foraminifera<sup>105</sup> found to be codominant with brown tide, which thrives in eutrophic marine environments<sup>106</sup>); *Hyalosira* (known to attach to seaweeds in intertidal environments<sup>107</sup>); and, *Grammatophora* (an epiphytic marine genus of diatoms found in coastal marine environments<sup>108</sup>). Furthermore, Bellairs identifies members of the genus *Gyrodinium* (marine heterotrophic dinoflagellates which prey on diatoms and can cause red tides<sup>109</sup>), and *Pleurocladia* (benthic brown alga epiphytes of macroalgae).

### Bellairs exclusively has low levels of Foraminifera

Analogous to the Stramenopiles, the Foraminifera contribute a surprising number of uniquely identified genera (9 of 34;  $p \ll 0.01$ , hypergeometric binned by clades directly from the root of Eukaryota; **Figure 3D**). There was no evidence of a Foraminifera taxon at Maycocks. Foraminifera are single-celled shelled protists and recognized as one of the most abundant groups of microorganisms in the shallow marine waters. The fact that their size range (100 $\mu$ m-20cm) is well beyond our filtered range may explain the paucity of reads for these taxa. Some amoeboid protists are often benthic or live in the sea sediment; at least 40 morphospecies are planktonic and form symbiotic relationships with marine algae. They are sensitive to the subtle changes in the ambient environment and species are known to survive and increase in numbers in polluted areas<sup>110</sup>. Planktonic foraminifera play an important role in the carbonate pump, contributing up to 50% of the total carbonate in the ocean sediment<sup>111</sup>. Genera *Neogloboquadrina*, *Globorotalia*, *Planoglobatella*, *Elphidium*, *Rosalina*, *Allogromia* and *Rotaliella* are all recognized as planktic. *Rosalina*, for example, is known to attach to seaweed and other marine benthic surfaces within shallow environments and can also be found unattached within sediment<sup>112</sup>. Species such as *R. leei* are able to thrive in ecologically stressed environments<sup>113</sup>.

### Other protists and single cell algae support primary production at Maycocks

With respect to the remaining subclades of Eukaryota, the Haptophyta are biased towards Maycocks (Dunn's test,  $p < 0.01$ ) and contribute several outlying genera including the coccolithophorid genus *Emiliania*. The main species within this genus is *E. huxleyi*, a unicellular photosynthetic eukaryote that is a key contributor to the oceanic carbon cycle via calcification, photosynthesis and export of inorganic matter to the oceans' interior<sup>114</sup>. The planktonic unicellular flagellates *Prymnesium* are also more abundant at Maycocks.

### Cyanophages are highly enriched at Maycocks, a site highly enriched for cyanobacteria

Metagenomic analysis of marine viruses was investigated within the context of the Tara Oceans Project<sup>115</sup> but these efforts used sequencing and bioinformatics platforms specific for viromes. Our investigation here is limited, since we selected for organisms between 0.22  $\mu$ m and 3  $\mu$ m. Nevertheless, 5.8% (B) and 3.6% (M) of all reads mapped to viruses (**Supplemental Information 4**). Consistent with the strong preference for Cyanobacteria (incl. *Prochlorococcus* and *Synechococcus*) at Maycocks (26% B vs 62% M), there is a comparably strong preference for cyanophages at Maycocks (KW and Dunn's test for Caudovirales, both  $p \ll 0.01$ ). Other well-established phages of *Prochlorococcus* and/or *Synechococcus*<sup>116</sup> including Myo-, Siph- and Podo- viruses are also identified in our data. In contrast, the small heterotrophic *Pelagibacter*, a member of the ubiquitous SAR11 clade, is highly enriched at Maycocks, however Podovirus phages of *Pelagibacter* are systematically shifted towards Bellairs (KW, Dunn's test,  $p \ll 0.01$ ), suggesting enrichment of the Podoviruses at Bellairs.

## Discussion

The two sites of the Barbadian coral reef system studied here differ in environmental and ecological attributes. This includes differences in their endogenous benthic communities including hard corals, coralline and sponges. Although both have suffered under the same global stressors, there is likely a differential in the effects of local stressors. For example, eutrophication has long been postulated as a major negative influence on the health of Barbadian reefs which lie close to urban areas and coastal run-offs<sup>16</sup> and corresponding studies of the macrobenthic community have noted decay in almost every dimension of such ecosystems<sup>17</sup>. This is the first study to use whole genome shotgun sequencing of the Barbadian reef water microbiome. The sequence data identifies over 9,000 species across the tree of life at both sites, and the composition of both communities appears in concordance with previous findings regarding coral reef health in Barbados. Although our study here is limited in scope, our samples do share many similarities with other ocean sites including the Tara Ocean project and several Caribbean specific projects, suggesting that the sequencing has captured many relevant features of the ecosystems.

Although it is infeasible to quantitatively estimate the physiological relevance of the observed differences in relative frequencies of taxa, there are striking and consistent differences between Bellairs and Maycocks. Maycocks is strongly concentrated with phototrophs and is a clear outlier in this dimension when compared against data from the Tara Ocean project. The levels of *Prochlorococcus* and *Synechococcus* are only matched by a study of nearby Curacao, suggesting that the southern Caribbean constitutes a cyanobacterial hotspot. The relative abundance of photosynthetic organisms other than the cyanobacteria are also significantly higher at Maycocks than Bellairs including genera *Candidatus Pelagibacter*, *Candidatus Poseidoniales*, *Micromonas* and the *Emilliana*.

In comparison, Bellairs is enriched for copiotrophs, macroalgal symbionts and marine-related disease-bearing organisms from taxa scattered across the tree of life. For Bacteria alone, this includes species from the Firmicutes (found in nutrient-rich extreme environments), species from the Planctomycetes (with established roles in coral degradation where turf algae is dominant), many Rhodobacterales species (that utilize compounds in a nutrient rich environment for the production of secondary metabolites), at least six genera of *Dinoroseobacter* (commonly found in marine turf algae and which participate in nitrate reduction), the *Desulfomicrobium* (sulfate-reducing bacteria that thrive in marine anoxic environments and in interfaces such as microbial mats), the *Acinetobacter* (associated with mineralization of aromatic compounds), and several species of the genus *Vibrio* (well implicated in marine diseases including white band and yellow spot syndrome). The Archaea highlight the Nitrosopumilales genera (pelagic ammonia-oxidizing thaumarchaeon involved in nitrification and carbon fixation). The Eukaryota include the *Boodlea* (nitrophilic macroalgae species capable of rapid growth in nutrient rich waters), in addition to many diatoms and dinoflagellates (*Licmophora*, *Cylindrotheca*, *Seminavis*, *Gyrodinium*, *Pleurocladia*, *Minutocellus*). These all have established roles in marine coral reef settings including the ability to form algal mats which smother coral.



Our data indicates a shift from coral to macroalgae between Bellairs and Maycocks, an observation with potential importance for the design and feasibility of coral rehabilitation projects around the island. More generally, broader longitudinal studies would provide more information regarding the rate and direction of change, and may perhaps identify ecological markers suitable for diagnostic, prognostic or predictive purposes when integrated with macrobenthic monitoring and international oceanic profiling projects.

## Methods

Analyses here were carried out in R version 4.03<sup>117</sup>.

### 1. Sample collection and preparation

Samples were collected during the afternoon from two locations along the west coast of Barbados; Folkestone Marine Reserve (13°11'30.2"N 59°38'29.2"W) and Hangman's Bay (13°17'32.9"N 59°39'47.5"W) on January 30th and 31st 2018 respectively. At the time of sampling the ocean current was flowing in a northwestern direction between the two sample days<sup>118</sup>. Sea water was collected from the Bellairs reef site located in Folkestone Marine Reserve just below the surface. Seawater was collected at 1 metre above the Maycock reef located in Hangman's Bay using SCUBA and a boat for reef access. All samples were collected using 7L acid-washed bottles between 1-3pm in the afternoon. The samples were transported back to shore and immediately passed through a 3µm pore polycarbonate membrane filter, followed by 0.22 µm pore Sterivex filter, in both cases using a peristaltic pump (7" of mercury). Organisms captured by the 3µm filter were discarded. RNA later was added to the 0.22µm filter and stored at -80°C. We therefore expected that organisms smaller than 0.22µm are removed from the analysis. The range of organism size is consistent with the sample collection specifications of the Tara Oceans project<sup>33,34</sup>. Surface sea water temperature at time of collection was estimated using archived data and images from the NOAA Coral Reef Watch<sup>119</sup>.

### 2. Nutrient analysis and estimates of microbial content in the seawater samples

Water measurements were taken using an EXO2 Multiparameter Sonde, 20m apart at a depth of 5m at both sampling sites. This analysis was conducted on September 4th 2020. Seawater temperature, salinity and dissolved oxygen information was collected (3 sample readings per location). Sea water samples were also collected to conduct analysis of nitrates, nitrites, phosphates and turbidity. These analyzes were conducted by the Centre for Resource Management and Environmental Studies (CERMES, Barbados). Nitrate and nitrite concentration was determined using the cadmium reduction method, phosphate concentration by the ascorbic acid method, while turbidity was determined using a turbidity meter.

Direct counts of Bacteria, Archaea and Virus-like particles were generated using methods described previously<sup>120</sup>. Aliquots of the seawater samples used for the metagenomics were stored at -80°C in acid-washed two 60ml polycarbonate bottles with TE-glycerol to each bottle, they were then immediately stored at -80°C. At time of microscopy, samples were unfrozen and aliquots of 6 ml per sample were fixed with Electron Microscopy Sciences 4%



Paraformaldehyde (5025999, Fisher Scientific), stained with SYBR<sup>TM</sup> Gold Nucleic Acid Gel Stain (S11494, ThermoFisher) and centrifuged for 3 hours. The samples were placed onto 0.02  $\mu\text{m}$  Anodisc inorganic filters (WHA68096002, Millipore Sigma) and mounted on glass slides. Counting was done using epifluorescence microscopy. Images were captured on a Nikon Ti inverted microscope equipped with metal halide lamp (Nikon), GFP filter (480/40ex, 520/75em), and Photometrics Prime BSI camera using NIS Elements software. Images were then preprocessed using FIJI ImageJ.

### 3. Nucleic acid extraction

DNA was extracted from the Sterivex filter using the DNEASY PowerWater Kit (14900, Qiagen Inc.) with an additional 37°C Incubation step. The Sterivex filter was thawed, unfolded and carefully placed into a PowerWater bead tube. To initiate cell lysis, 1 ml of a buffer composed of guanidine thiocyanate (PW1) was preheated to 55°C for 10 minutes and added to the bead tube. The bead tube was placed horizontally to incubate at 65°C for 10 minutes. The bead tube was then vortexed at 3000 RPM for 5 minutes. After vortexing, the bead tube was centrifuged for 1 minute at 3,000g. Once centrifuged, 600-650  $\mu\text{l}$  of supernatant was transferred to a new 2 ml collection tube. Then, 1  $\mu\text{l}$  of RNase A was added and the tube was incubated at 37 °C for 30 minutes. After incubation the tube was centrifuged at 13,000g for 1 minute; the supernatant was then transferred to a new 2 ml collection tube and 200  $\mu\text{l}$  of an IRS solution (PW2) was added. The tube was then vortexed briefly followed by incubation at 4°C for 5 minutes, then centrifuged for 1 minute at 13000g. The supernatant was then transferred to a new 2ml collection tube; 650  $\mu\text{l}$  of a high concentrated salt solution (PW3) was preheated to 55°C and added; the tube was then vortexed briefly. 650  $\mu\text{l}$  of the supernatant was loaded onto a MB Spin Column Filter and centrifuged at 13000g for 1 minute. The flow-through was discarded and centrifugation was repeated until all of the supernatant was processed. The MB Spin Column was placed into a new 2 ml collection tube; 650  $\mu\text{l}$  of an alcohol-based solution (PW4) was added. The tube was then centrifuged for 1 minute at 13000g. The flow-through was discarded and 650  $\mu\text{l}$  of ethanol (PW5) was added. The tube was then centrifuged at 13000g for 1 minute; the flow-through was discarded and the tube was again centrifuged for an additional 2 minutes. The MB Spin Column was then placed into a new 1.5 ml tube (lid removed); 50  $\mu\text{l}$  of an elution buffer (PW6) was added and the tube was left to sit for 2 minutes. The tube was centrifuged at 13000g for 1 minute. The supernatant was then transferred to a new 1.5 ml tube (with lid) and stored at -80°C.

### 4. DNA sequencing

In preparation for sequencing the two DNA extracted samples were thawed and resuspended in 10 mM Tris-HCl pH 8.0 with 0.1mM of EDTA. Next generation DNA-level sequencing was performed on the two samples at the McGill University and Genome Quebec Centre on the NovaSeq PE 150 platform generating 2 x 150bp paired-end reads. Library preparation was performed by Genome Quebec based on the following protocol. gDNA was quantified using Quant-iT<sup>TM</sup> PicoGreen dsDNA Assay Kit (P11496, Life Technologies Inc). Libraries were generated using NEBNext Ultra II DNA Library Prep Kit for Illumina (E7103, New England Biolabs). The IDT Unique Dual Index adapters and universal primers used were

[AGATCGGAAGAGCACACGTCTGAACTCCAGTCAC][AGATCGGAAGAGCGTCGTGTAGGGAAAGA GTGT]. Size selection of libraries at 360bp was performed using SparQ beads (Qiagen Inc.). Libraries were quantified using Kapa Illumina GA with Revised Primers-SYBR Fast Universal kit (Kapa Biosystems Inc.). Average size fragment was determined using a LabChip GX (PerkinElmer Inc.) instrument.

## 5. Quality control of sequencing results

The total number of raw paired end reads (2 x 150bp) returned by NovaSeq was 19 and 30.5 million at Bellairs and Maycocks respectively. The quality of reads was first assessed using FastQC version 0.11.5<sup>121</sup>, which provides several metrics for assessing the overall quality of reads including GC bias, sequence quality, base sequence content, base N content, sequence length distribution, sequence duplication levels, overrepresented sequences, the adapter, the distribution of observed k-mers, and the reliability and quality of all bases at each position along a read. Illumina adapters from the paired-end reads were trimmed using Trimmomatic version 0.38 with parameters 'ILLUMINACLIP:NovaSeq.fa:2:30:10 LEADING:3 TRAILING:3 SLIDINGWINDOW:4:15 and MINLEN:36'<sup>122</sup>. Trimmomatic also filtered out 2.1M reads which were either found to be unpaired or had a length less than 36bp. Quality of the reads was assessed post-trimming using FastQC. Unpaired, short or poor quality reads were removed (4.1% and 4.5% of all reads for Bellairs and Maycocks, respectively).

## 6. Read alignment & taxa classification via Kraken2/Bracken

We used Kraken2<sup>38</sup> to align and classify the observed sequencing reads against a range of genomes. Kraken2 compares the distribution of k-mers in a query sequence, which is a read (or pair-end read after pre-processing), against the k-mer distribution of genomes in a database of target taxa. For each query sequence, Kraken2 identifies the least common ancestor (LCA) of these taxa in our target genomes which include the plasmid, viral, protozoa, plant, UniVec, env\_nr, nr, bacteria, archaea and fungi NCBI downloads and the MAR reference database for marine metagenomics<sup>41</sup>. Bracken<sup>39</sup> was then applied to the taxonomic assignments made by Kraken2. Bracken uses the Kraken2 assignments in addition to information about the genomes themselves to better estimate abundance at the species level, the genus level, or above. Bracken was used here with a k-mer length of 35 and a read length of 100. Bracken discards reads based on a given threshold. Taxa with total reads less than the set threshold of 10 reads were discarded.

## 7. Taxonomic analysis

Our in-house analysis made use of the NCBI Taxonomy database (version March 31, 2020)<sup>40</sup>. After importing the Taxonomy database into R, we mapped read counts for both sites on the nodes of the tree. Reads mapped to non-single cell taxa were removed from the analysis (**Supplemental Information 1**). The data was examined for ecological richness/diversity and adjusted to handle zero counts (**Supplemental Information 2**) and for genome size (**Supplemental Information 3**).

## 8. Compositional Data and Comparative analyses

Our metagenomic data is compositional in nature<sup>123–125</sup> and we have attempted to follow so-called CoDa (Compositional Data) best-practice guidelines<sup>124,125</sup>.

8a. A standard Pearson's  $\chi^2$  test was used to test for statistically significant differences between two multinomial distributions with p-value thresholds depending on the context (chisq.test R function). Here the null distribution is that both sites were generated by a single multinomial distribution.

8b. A two-sided binomial test was used to test for statistically significant differences between the observed marginal frequency (for a component of the multinomial) versus its frequency according to the multinomial distribution (function binom.test R function).

8c. A Kruskal-Wallis test was used to test for statistically significant differences between two or more groups (taxa, described as multinomial distributions derived from our observed data; kruskal.test R function). The null hypothesis is that both sites were generated by the same distribution. When the alternative hypothesis is accepted, it implies that at least one group stochastically dominates another group. Significance was estimated using a p-value threshold. Dunn's test was used to identify which taxa is stochastically dominant.

## 9. Comparison with the Tara Oceans marine metagenomic samples

The metagenomic sequences and the associated metadata were downloaded from the companion website of Sunagawa and colleagues<sup>33</sup>. Samples that were not filtered for organisms in the range of 0.22 $\mu$ m and 3 $\mu$ m were excluded from our analyses. With respect to the metadata, we primarily made use of Tables W1 (description of the sampling sites), W5 (miTAG related data) and W8 (a broad range of molecular concentrations, temperatures, and computational measures of diversity). The miTAG 16S abundance estimations were loaded into our R data frame as described in Methods 8. We first attempted to adjust for zeros in this dataset alongside our two samples using a multiplicate Bayesian approach<sup>126</sup>, but could not achieve convergence, since some Tara Oceans samples had zero counts for >50% of the taxa. To achieve convergence we had to remove taxa, a procedure we deemed undesirable and unnecessary as the observed adjustments were very small. We opted instead to simply add 1 to all entries in the count matrix.

Clustering was performed by first identifying the most abundant taxa for each sample, and then transforming these abundances to ranks. Then the Kendall  $\tau$  distance metric was used with Ward's algorithm to construct two dimensional hierarchical clusters.

## Acknowledgements

We thank the Bellairs Research Institute of McGill University and the Centre for Resource Management and Environmental Studies (CERMES) at the University of the West Indies, Cavehill Campus, for their assistance with the logistics of experiments.

## Author Contributions

MH obtained the appropriate CITES permit for this work. RR, SM and VM assisted with the logistics of sample collection and transportation. MM and AR collected the samples taken at Maycocks and Bellairs respectively. SS and SK prepared samples for sequencing. HV and YV evaluated sampling, collected metadata and water chemistry. SS, VD and VB built the bioinformatic pipelines. SS, VD and MH performed data science analyses. DW provided guidance and financial support for sequencing. MH designed and supervised the project, contributing funding, analyses, and manuscript preparation. SS conducted the microscopy and measurement of physio-chemical variables in the study. This work was supported by grants awarded to MH from the NSERC Discovery and the Canadian Research Chairs programs.

## Competing interests

The authors declare no competing interests.

## Data availability

The raw sequencing data is available at the National Center for Biotechnology Information (NCBI) Sequence Read Archive (SRA) with BioProject accession number PRJNA685579. Normalized sequencing data is available at the Joint Genome Institute (JGI) from the GOLD database with study ID Gs0136136. All code is available via GitHub at <https://github.com/hallettmiket/barbadian-reef>. This repository in turn provides access to all data and analyses at Zenodo.

This work was approved by the Coastal Zone Management Unit, of the Ministry of Maritime Affairs and the Blue Economy, of the Government of Barbados CZ01/9/9.

## References

1. Hoegh-Guldberg, O., Poloczanska, E. S., Skirving, W. & Dove, S. Coral Reef Ecosystems under Climate Change and Ocean Acidification. *Front. Mar. Sci.* **4**, (2017).

2. Kaimba, A., de Villiers, S. & Wambua, S. Does Protection of Marine Areas Safeguard Coral Reefs From Human-Source Pollution? *Front. Environ. Sci.* **7**, (2019).
3. Dance, A. These corals could survive climate change — and help save the world’s reefs. *Nature* **575**, 580–582 (2019).
4. Camp, E. F. *et al.* The Future of Coral Reefs Subject to Rapid Climate Change: Lessons from Natural Extreme Environments. *Front. Mar. Sci.* **5**, (2018).
5. Edmunds, P. J. Three decades of degradation lead to diminished impacts of severe hurricanes on Caribbean reefs. *Ecology* **100**, e02587 (2019).
6. Kuanui, P. *et al.* Effect of light intensity on survival and photosynthetic efficiency of cultured corals of different ages. *Estuar. Coast. Shelf Sci.* **235**, 106515 (2020).
7. Jones, R. *et al.* Responses of corals to chronic turbidity. *Sci. Rep.* **10**, 4762 (2020).
8. Ibarbalz, F. M. *et al.* Global Trends in Marine Plankton Diversity across Kingdoms of Life. *Cell* **179**, 1084-1097.e21 (2019).
9. Cameron, K. A. & Harrison, P. L. Density of coral larvae can influence settlement, post-settlement colony abundance and coral cover in larval restoration. *Sci. Rep.* **10**, 5488 (2020).
10. Vanwonderghem, I. & Webster, N. S. Coral Reef Microorganisms in a Changing Climate. *iScience* **23**, 100972 (2020).
11. Oxenford, H. A. & Vallès, H. Transient turbid water mass reduces temperature-induced coral bleaching and mortality in Barbados. *PeerJ* **4**, e21118 (2016).
12. Ladd, M. C., Burkepile, D. E. & Shantz, A. A. Near-term impacts of coral restoration on target species, coral reef community structure, and ecological processes. *Restor. Ecol.* **27**, 1166–1176 (2019).
13. Fabricius, K. E. *et al.* Disturbance gradients on inshore and offshore coral reefs caused by

- a severe tropical cyclone. *Limnol. Oceanogr.* **53**, 690–704 (2008).
14. Lamb, J. B. *et al.* Plastic waste associated with disease on coral reefs. *Science* **359**, 460–462 (2018).
  15. Pulwarty, R. S., Nurse, L. A. & Trotz, U. O. Caribbean Islands in a Changing Climate. *Environ. Sci. Policy Sustain. Dev.* **52**, 16–27 (2010).
  16. Bell, P. R. & Tomascik, T. The demise of the fringing coral reefs of Barbados and of the Great Barrier Reef lagoon - impacts of eutrophication. in 319–25 (1993).
  17. Cermes. *The Barbados Coral Reef Monitoring Programme: Changes in Coral Reef Communities on the West and South Coasts 2007-2012*. 81 (2018).
  18. Oxenford, H. A. *et al.* Quantitative observations of a major coral bleaching event in Barbados, Southeastern Caribbean. *Clim. Change* **87**, 435 (2007).
  19. Langin, K. Seaweed masses assault Caribbean islands. *Science* **360**, 1157–1158 (2018).
  20. van Tussenbroek, B. I. *et al.* Severe impacts of brown tides caused by *Sargassum* spp. on near-shore Caribbean seagrass communities. *Mar. Pollut. Bull.* **122**, 272–281 (2017).
  21. Camacho, R., Steele, S., Challenger, S. & Archibald, M. Status of coral reefs in Antigua & Barbuda: using data to inform management. *PeerJ* **8**, e9236 (2020).
  22. Steneck, R. S., Mumby, P. J., MacDonald, C., Rasher, D. B. & Stoyke, G. Attenuating effects of ecosystem management on coral reefs. *Sci. Adv.* **4**, eaao5493 (2018).
  23. Glasl, B. *et al.* Microbial indicators of environmental perturbations in coral reef ecosystems. *Microbiome* **7**, 94 (2019).
  24. Roitman, S. *et al.* Surviving marginalized reefs: assessing the implications of the microbiome on coral physiology and survivorship. *Coral Reefs* **39**, 795–807 (2020).
  25. Weber, L. *et al.* Microbial signatures of protected and impacted Northern Caribbean reefs: changes from Cuba to the Florida Keys. *Environ. Microbiol.* **22**, 499–519 (2020).

26. Parkinson, J. E. *et al.* Molecular tools for coral reef restoration: Beyond biomarker discovery. *Conserv. Lett.* **13**, e12687 (2020).
27. Peixoto, R. S., Rosado, P. M., Leite, D. C. de A., Rosado, A. S. & Bourne, D. G. Beneficial Microorganisms for Corals (BMC): Proposed Mechanisms for Coral Health and Resilience. *Front. Microbiol.* **8**, (2017).
28. Harvell, D. *et al.* Coral Disease, Environmental Drivers, and the Balance Between Coral and Microbial Associates. *Oceanography* **20**, 172–195 (2007).
29. Vallès, H., Oxenford, H. A. & Henderson, A. Switching between standard coral reef benthic monitoring protocols is complicated: proof of concept. *PeerJ* **7**, e8167 (2019).
30. Aronson, R. B. & Precht, W. F. Conservation, precaution, and Caribbean reefs. *Coral Reefs* **25**, 441–450 (2006).
31. Bellwood, D. R., Hughes, T. P. & Hoey, A. S. Sleeping Functional Group Drives Coral-Reef Recovery. *Curr. Biol.* **16**, 2434–2439 (2006).
32. Rusch, D. B. *et al.* The Sorcerer II Global Ocean Sampling Expedition: Northwest Atlantic through Eastern Tropical Pacific. *PLOS Biol.* **5**, e77 (2007).
33. Sunagawa, S. *et al.* Structure and function of the global ocean microbiome. *Science* **348**, 1261359–1261359 (2015).
34. Pierella Karlusich, J. J., Ibarbalz, F. M. & Bowler, C. Phytoplankton in the *Tara* Ocean. *Annu. Rev. Mar. Sci.* **12**, 233–265 (2020).
35. Leite, D. C. A. *et al.* Coral Bacterial-Core Abundance and Network Complexity as Proxies for Anthropogenic Pollution. *Front. Microbiol.* **9**, (2018).
36. Helmer, E. H. *et al.* Land cover and forest formation distributions for St. Kitts, Nevis, St. Eustatius, Grenada and Barbados from decision tree classification of cloud-cleared satellite imagery. *Caribbean Journal of Science.* 44(2):175-198. *Caribb. J. Sci.* 442175-198



- 44**, 175–198 (2008).
37. Leitch, C. & Harbor, J. Impacts of land use change on freshwater runoff into the near-coastal zone, Holetown Watershed, Barbados: Comparisons of long-term to single-storm effects. *J. Soil Water Conserv.* **54**, 584–592 (1999).
  38. Wood, D. E. & Salzberg, S. L. Kraken: ultrafast metagenomic sequence classification using exact alignments. *Genome Biol.* **15**, R46 (2014).
  39. Lu, J., Breitwieser, F. P., Thielen, P. & Salzberg, S. L. Bracken: estimating species abundance in metagenomics data. *PeerJ Comput. Sci.* **3**, e104 (2017).
  40. Federhen, S. The NCBI Handbook: The Taxonomy Project. **4**, (2002).
  41. Klemetsen, T. *et al.* The MAR databases: development and implementation of databases specific for marine metagenomics. *Nucleic Acids Res.* **46**, D692–D699 (2018).
  42. Sayers, E. W. *et al.* Database resources of the National Center for Biotechnology Information. *Nucleic Acids Res.* **37**, D5-15 (2009).
  43. Karsenti, E. *et al.* A Holistic Approach to Marine Eco-Systems Biology. *PLoS Biol.* **9**, e1001177 (2011).
  44. Žure, M., Fernandez-Guerra, A., Munn, C. B. & Harder, J. Geographic distribution at subspecies resolution level: closely related *Rhodopirellula* species in European coastal sediments. *ISME J.* **11**, 478–489 (2017).
  45. Lage, O. M., Albuquerque, L., Lobo-da Cunha, A. & da Costa, M. S. *Mariniblastus fucicola* gen. nov., sp. nov. a novel planctomycete associated with macroalgae. *Int. J. Syst. Evol. Microbiol.* **67**, 1571–1576 (2017).
  46. Reza, Md. S. *et al.* Basin-scale seasonal changes in marine free-living bacterioplankton community in the Ofunato Bay. *Gene* **665**, 185–191 (2018).
  47. Ranjani, A., Dhanasekaran, D. & Gopinath, P. M. An Introduction to Actinobacteria. in

- Actinobacteria - Basics and Biotechnological Applications* (eds. Dhanasekaran, D. & Jiang, Y.) (InTech, 2016). doi:10.5772/62329.
48. Biller, S. J., Berube, P. M., Lindell, D. & Chisholm, S. W. Prochlorococcus: the structure and function of collective diversity. *Nat. Rev. Microbiol.* **13**, 13–27 (2015).
  49. Wawrik, B. *et al.* Vertical structure of the phytoplankton community associated with a coastal plume in the Gulf of Mexico. *Mar. Ecol. Prog. Ser.* **251**, 87–101 (2003).
  50. Frias-Lopez, J., Zerkle, A. L., Bonheyo, G. T. & Fouke, B. W. Partitioning of Bacterial Communities between Seawater and Healthy, Black Band Diseased, and Dead Coral Surfaces. *Appl. Environ. Microbiol.* **68**, 2214–2228 (2002).
  51. Galperin, M. Y. Genome Diversity of Spore-Forming Firmicutes. *Microbiol. Spectr.* **1**, (2013).
  52. Torres, G. G., Figueroa-Galvis, I., Muñoz-García, A., Polanía, J. & Vanegas, J. Potential bacterial bioindicators of urban pollution in mangroves. *Environ. Pollut.* **255**, 113293 (2019).
  53. Manrique, J. M. *et al.* Effects of UV radiation on the taxonomic composition of natural bacterioplankton communities from Bahía Engaño (Patagonia, Argentina). *J. Photochem. Photobiol. B* **117**, 171–178 (2012).
  54. Su, H. *et al.* Diversity of cultivable protease-producing bacteria and their extracellular proteases associated to scleractinian corals. *PeerJ* **8**, (2020).
  55. Pohlner, M. *et al.* The Majority of Active Rhodobacteraceae in Marine Sediments Belong to Uncultured Genera: A Molecular Approach to Link Their Distribution to Environmental Conditions. *Front. Microbiol.* **10**, 659 (2019).
  56. Wagner-Döbler, I. *et al.* The complete genome sequence of the algal symbiont *Dinoroseobacter shibae* : a hitchhiker’s guide to life in the sea. *ISME J.* **4**, 61–77 (2010).

57. Huggett, M. J., McMahon, K. & Bernasconi, R. Future warming and acidification result in multiple ecological impacts to a temperate coralline alga. *Environ. Microbiol.* **20**, 2769–2782 (2018).
58. Moran, M. A. *et al.* Ecological Genomics of Marine Roseobacters. *Appl. Environ. Microbiol.* **73**, 4559–4569 (2007).
59. Apprill, A., Marlow, H. Q., Martindale, M. Q. & Rappé, M. S. The onset of microbial associations in the coral *Pocillopora meandrina*. *ISME J.* **3**, 685–699 (2009).
60. Dinasquet, J., Landa, M. & Obernosterer, I. High contribution of Pelagibacterales to bacterial community composition and activity in spring blooms off Kerguelen Island (Southern Ocean). *bioRxiv* 633925 (2019) doi:10.1101/633925.
61. Steindler, L., Schwalbach, M. S., Smith, D. P., Chan, F. & Giovannoni, S. J. Energy Starved Candidatus Pelagibacter Ubique Substitutes Light-Mediated ATP Production for Endogenous Carbon Respiration. *PLOS ONE* **6**, e19725 (2011).
62. Munn, C. B. The Role of Vibrios in Diseases of Corals. *Microbiol. Spectr.* **3**, (2015).
63. Cróquer, A., Bastidas, C., Elliott, A. & Sweet, M. Bacterial assemblages shifts from healthy to yellow band disease states in the dominant reef coral *Montastraea faveolata*: Shifts in microbial diversity from healthy to YBD tissues. *Environ. Microbiol. Rep.* **5**, 90–96 (2013).
64. Sussman, M. *et al.* *Vibrio* zinc-metalloprotease causes photoinactivation of coral endosymbionts and coral tissue lesions. *PloS One* **4**, e4511 (2009).
65. Amin, A. K. M. R. *et al.* The First Temporal and Spatial Assessment of *Vibrio* Diversity of the Surrounding Seawater of Coral Reefs in Ishigaki, Japan. *Front. Microbiol.* **7**, (2016).
66. Goarant, C. *et al.* “Summer Syndrome” in *Litopenaeus stylirostris* in New Caledonia: Pathology and epidemiology of the etiological agent, *Vibrio nigripulchritudo*. *Aquaculture* **253**, 105–113 (2006).

67. Xie, Z. Y. *et al.* Identification and pathogenicity of *Vibrio ponticus* affecting cultured Japanese sea bass, *Lateolabrax japonicus* (Cuvier in Cuvier and Valenciennes). *Let. Appl. Microbiol.* **45**, 62–67 (2007).
68. Rivas, A. J., Lemos, M. L. & Osorio, C. R. *Photobacterium damsela* subsp. *damsela*, a bacterium pathogenic for marine animals and humans. *Front. Microbiol.* **4**, (2013).
69. Doughari, H. J., Ndakidemi, P. A., Human, I. S. & Benade, S. The Ecology, Biology and Pathogenesis of *Acinetobacter* spp.: An Overview. *Microbes Environ.* **26**, 101–112 (2011).
70. Choi, J.-Y. *et al.* *Acinetobacter* species isolates from a range of environments: species survey and observations of antimicrobial resistance. *Diagn. Microbiol. Infect. Dis.* **74**, 177–180 (2012).
71. Dupont, C. L. *et al.* Genomic insights to SAR86, an abundant and uncultivated marine bacterial lineage. *ISME J.* **6**, 1186–1199 (2012).
72. Miralles, G. *et al.* Alkane biodegradation and dynamics of phylogenetic subgroups of sulfate-reducing bacteria in an anoxic coastal marine sediment artificially contaminated with oil. *Chemosphere* **68**, 1327–1334 (2007).
73. Dias, M. *et al.* Characterization of *Desulfomicrobium salsuginis* sp. nov. and *Desulfomicrobium aestuarii* sp. nov., two new sulfate-reducing bacteria isolated from the Adour estuary (French Atlantic coast) with specific mercury methylation potentials. *Syst. Appl. Microbiol.* **31**, 30–37 (2008).
74. Sheik, C. S., Jain, S. & Dick, G. J. Metabolic flexibility of enigmatic SAR324 revealed through metagenomics and metatranscriptomics: Disentangling the ecophysiological role of SAR324. *Environ. Microbiol.* **16**, 304–317 (2014).
75. Sánchez-Quinto, A. & Falcón, L. I. Metagenome of *Acropora palmata* coral rubble: Potential metabolic pathways and diversity in the reef ecosystem. *PLOS ONE* **14**,

- e0220117 (2019).
76. Ufnar, J. a. *et al.* Detection of the *nifH* gene of *Methanobrevibacter smithii*: a potential tool to identify sewage pollution in recreational waters. *J. Appl. Microbiol.* **101**, 44–52 (2006).
  77. Angel, R., Claus, P. & Conrad, R. Methanogenic archaea are globally ubiquitous in aerated soils and become active under wet anoxic conditions. *ISME J.* **6**, 847–862 (2012).
  78. Hirakata, Y. *et al.* Identification and Detection of Prokaryotic Symbionts in the Ciliate *Metopus* from Anaerobic Granular Sludge. *Microbes Environ.* **30**, 335–338 (2015).
  79. Turque, A. S. *et al.* Environmental Shaping of Sponge Associated Archaeal Communities. *PLOS ONE* **5**, e15774 (2010).
  80. Rinke, C. *et al.* A phylogenomic and ecological analysis of the globally abundant Marine Group II archaea (Ca. Poseidoniales ord. nov.). *ISME J.* **13**, 663–675 (2019).
  81. Zhang, F. *et al.* Symbiotic archaea in marine sponges show stability and host specificity in community structure and ammonia oxidation functionality. *FEMS Microbiol. Ecol.* **90**, 699–707 (2014).
  82. Santoro, A. E. *et al.* Genomic and proteomic characterization of “Candidatus Nitrosopelagicus brevis”: An ammonia-oxidizing archaeon from the open ocean. *Proc. Natl. Acad. Sci. U. S. A.* **112**, 1173–1178 (2015).
  83. Cuvelier, M. L. *et al.* Responses of the picoprasinophyte *Micromonas commoda* to light and ultraviolet stress. *PLOS ONE* **12**, e0172135 (2017).
  84. Šlapeta, J., López-García, P. & Moreira, D. Global Dispersal and Ancient Cryptic Species in the Smallest Marine Eukaryotes. *Mol. Biol. Evol.* **23**, 23–29 (2006).
  85. Bakker, J. *et al.* Biodiversity assessment of tropical shelf eukaryotic communities via pelagic eDNA metabarcoding. *Ecol. Evol.* **9**, 14341–14355 (2019).
  86. Leliaert, F., Verbruggen, H., Wysor, B. & Clerck, O. D. DNA taxonomy in morphologically

- plastic taxa: Algorithmic species delimitation in the *Boodlea* complex (Chlorophyta: Cladophorales). *Mol. Phylogenet. Evol.* **53**, 122–133 (2009).
87. Vroom, P. *et al.* Macroalgal (*Boodlea composita*) bloom at Kure and Midway Atolls, Northwestern Hawaiian Islands. *Bot. Mar.* **52**, 361–363 (2009).
  88. Clifton, K. E. & Clifton, L. M. The Phenology of Sexual Reproduction by Green Algae (bryopsidales) on Caribbean Coral Reefs. *J. Phycol.* **35**, 24–34 (1999).
  89. Smith, T. B., Fong, P., Kennison, R. & Smith, J. Spatial refuges and associational defenses promote harmful blooms of the alga *Caulerpa sertularioides* onto coral reefs. *Oecologia* **164**, 1039–1048 (2010).
  90. Crockett, P. F. & Keough, M. J. Ecological niches of three abundant *Caulerpa* species in Port Phillip Bay, southeast Australia. *Aquat. Bot.* **119**, 120–131 (2014).
  91. Dimier, C., Brunet, C., Geider, R. & Raven, J. Growth and photoregulation dynamics of the picoeukaryote *Pelagomonas calceolata* in fluctuating light. *Limnol. Oceanogr.* **54**, 823–836 (2009).
  92. Kang, H. C. *et al.* Spatial and seasonal distributions of the phototrophic dinoflagellate *Biecheleriopsis adriatica* (Suessiaceae) in Korea: quantification using qPCR. *ALGAE* **34**, 111–126 (2019).
  93. Müller, M. N. *et al.* Ichthyotoxicity of the Dinoflagellate *Karlodinium veneficum* in Response to Changes in Seawater pH. *Front. Mar. Sci.* **6**, (2019).
  94. Bi, R., Chan, G., Hyun, J. & Duncun, J. The Effect of Acidification on the Ability of *Euglena gracilis* to Perform Positive Phototaxis | The Expedition. (2019).
  95. Anderson, D. M. *et al.* The globally distributed genus *Alexandrium*: multifaceted roles in marine ecosystems and impacts on human health. *Harmful Algae* **14**, 10–35 (2012).
  96. Pfister, G. & Arndt, H. Food selectivity and feeding behaviour in omnivorous filter-feeding

- ciliates: A case study for Stylonychia. *Eur. J. Protistol.* **34**, 446–457 (1998).
97. Velo-Suárez, L., Brosnahan, M. L., Anderson, D. M. & Jr, D. J. M. A Quantitative Assessment of the Role of the Parasite Amoebophrya in the Termination of Alexandrium fundyense Blooms within a Small Coastal Embayment. *PLOS ONE* **8**, e81150 (2013).
  98. Hu, L. *et al.* Characterizing the Interactions Among a Dinoflagellate, Flagellate and Bacteria in the Phycosphere of Alexandrium tamarense (Dinophyta). *Front. Mar. Sci.* **2**, (2015).
  99. Vega de Luna, F., Dang, K.-V., Cardol, M., Roberty, S. & Cardol, P. Photosynthetic capacity of the endosymbiotic dinoflagellate Cladocopium sp. is preserved during digestion of its jellyfish host Mastigias papua by the anemone Entacmaea medusivora. *FEMS Microbiol. Ecol.* **95**, (2019).
  100. Eckert, R. J., Reaume, A. M., Sturm, A. B., Studivan, M. S. & Voss, J. D. Depth Influences Symbiodiniaceae Associations Among Montastraea cavernosa Corals on the Belize Barrier Reef. *Front. Microbiol.* **11**, (2020).
  101. Sweet, M. J. & Séré, M. G. Ciliate communities consistently associated with coral diseases. *J. Sea Res.* **113**, 119–131 (2016).
  102. Yamashiro, H., Mikame, Y. & Suzuki, H. Localized outbreak of attached diatoms on the coral Montipora due to low-temperature stress. *Sci. Rep.* **2**, 552 (2012).
  103. Li, J. *et al.* Effects of the diatom Cyllindrotheca fusiformis on the growth of the sea cucumber Apostichopus japonicus and water quality in ponds. *Aquac. Int.* **23**, 955–965 (2015).
  104. Park, J. S., Lobban, C. & Lee, K.-W. Diatoms associated with seaweeds from Moen Island in Chuuk Lagoon, Micronesia. *Phytotaxa* **351**, 101 (2018).
  105. Schmidt, C. *et al.* Recent Invasion of the Symbiont-Bearing Foraminifera Pararotalia into



- the Eastern Mediterranean Facilitated by the Ongoing Warming Trend. *PLoS One San Franc.* **10**, e0132917 (2015).
106. Qiao, L. *et al.* Quantitative PCR analysis of the spatiotemporal dynamics of *Aureococcus anophagefferens* and *Minutocellus polymorphus* and the relationship between brown tides and nutrients in the coastal waters of Qinhuangdao, China. *J. Appl. Phycol.* **29**, 297–308 (2017).
107. Totti, C. *et al.* Epiphytic diatom communities on intertidal seaweeds from Iceland. *Polar Biol.* **32**, 1681–1691 (2009).
108. Sato, S. *et al.* Auxospore Fine Structure and Variation in Modes of Cell Size Changes in *Grammatophora Marina* (Bacillariophyta). *Phycologia* **47**, (2008).
109. Yim, J. H., Kim, S. J., Ahn, S. H. & Lee, H. K. Characterization of a novel bioflocculant, p-KG03, from a marine dinoflagellate, *Gyrodinium impudicum* KG03. *Bioresour. Technol.* **98**, 361–367 (2007).
110. Nigam, R., Saraswat, R. & Panchang, R. Application of foraminifers in ecotoxicology: Retrospect, perspect and prospect. *Environ. Int.* **32**, 273–283 (2006).
111. Manno, C., Morata, N. & Bellerby, R. Effect of ocean acidification and temperature increase on the planktonic foraminifer *Neogloboquadrina pachyderma* (sinistral). *Polar Biol.* **35**, 1311–1319 (2012).
112. Todd, R. A new *Rosalina* (foraminifera) parasitic on a bivalve. *Deep Sea Res. Oceanogr. Abstr.* **12**, 831–837 (1965).
113. Kurtarkar Raikar, S., Nigam, R., Saraswat, R. & N, L. Regeneration and abnormality in benthic foraminifera *Rosalina leei*: Implications in reconstructing past salinity changes. *Riv. Ital. Paleontol. E Stratigr.* **117**, (2011).
114. Blanco-Ameijeiras, S. *et al.* Phenotypic Variability in the Coccolithophore *Emiliania huxleyi*.

- PLOS ONE* **11**, e0157697 (2016).
115. Brum, J. R. *et al.* Patterns and ecological drivers of ocean viral communities. *Science* **348**, 1261498–1261498 (2015).
116. Xiao, X., Zeng, Q., Zhang, R. & Jiao, N. Prochlorococcus viruses—From biodiversity to biogeochemical cycles. *Sci. China Earth Sci.* **61**, 1728–1736 (2018).
117. R Core Team. *R: A language and environment for statistical computing*. (2013).
118. OSCAR third degree resolution ocean surface currents. *Phys. Oceanogr. Distrib. Act. Arch. Cent. PODAAC Ver. 1*, (2009).
119. NOAA Coral Reef Watch. 2017, updated daily. NOAA Coral Reef Watch Version 3.0 Daily Global 5-km Satellite Virtual Station Time Series Data for Southeast Florida. (2013).
120. Dinsdale, E. A. *et al.* Microbial Ecology of Four Coral Atolls in the Northern Line Islands. *PLOS ONE* **3**, e1584 (2008).
121. Simons, A. *et al.* FastQC. <http://www.bioinformatics.babraham.ac.uk/projects/fastqc/> (2012).
122. Bolger, A. M., Lohse, M. & Usadel, B. Trimmomatic: a flexible trimmer for Illumina sequence data. *Bioinforma. Oxf. Engl.* **30**, 2114–2120 (2014).
123. Aitchison, J. *The Statistical Analysis of Compositional Data*. (Springer Netherlands, 1986).
124. Quinn, T. P. *et al.* A field guide for the compositional analysis of any-omics data. *GigaScience* **8**, giz107 (2019).
125. Gloor, G. B., Macklaim, J. M., Pawlowsky-Glahn, V. & Egozcue, J. J. Microbiome Datasets Are Compositional: And This Is Not Optional. *Front. Microbiol.* **8**, (2017).
126. Martín-Fernández, J. A., Palarea-Albaladejo, J. & Olea, R. A. Dealing with Zeros. in *Compositional Data Analysis* (eds. Pawlowsky-Glahn, V. & Buccianti, A.) 43–58 (John Wiley & Sons, Ltd, 2011). doi:10.1002/9781119976462.ch4.

## **Supplemental information: A metagenomic-based study of two sites from the Barbadian reef system**

Simpson S, Bettauer V, Ramachandran A, Kramer S, Mahon S, Medina M, Vallès Y, Dumeaux V, Vallès H, Walsh D, Hallett MT\*

Contact Author: [michael.hallett@concordia.ca](mailto:michael.hallett@concordia.ca)

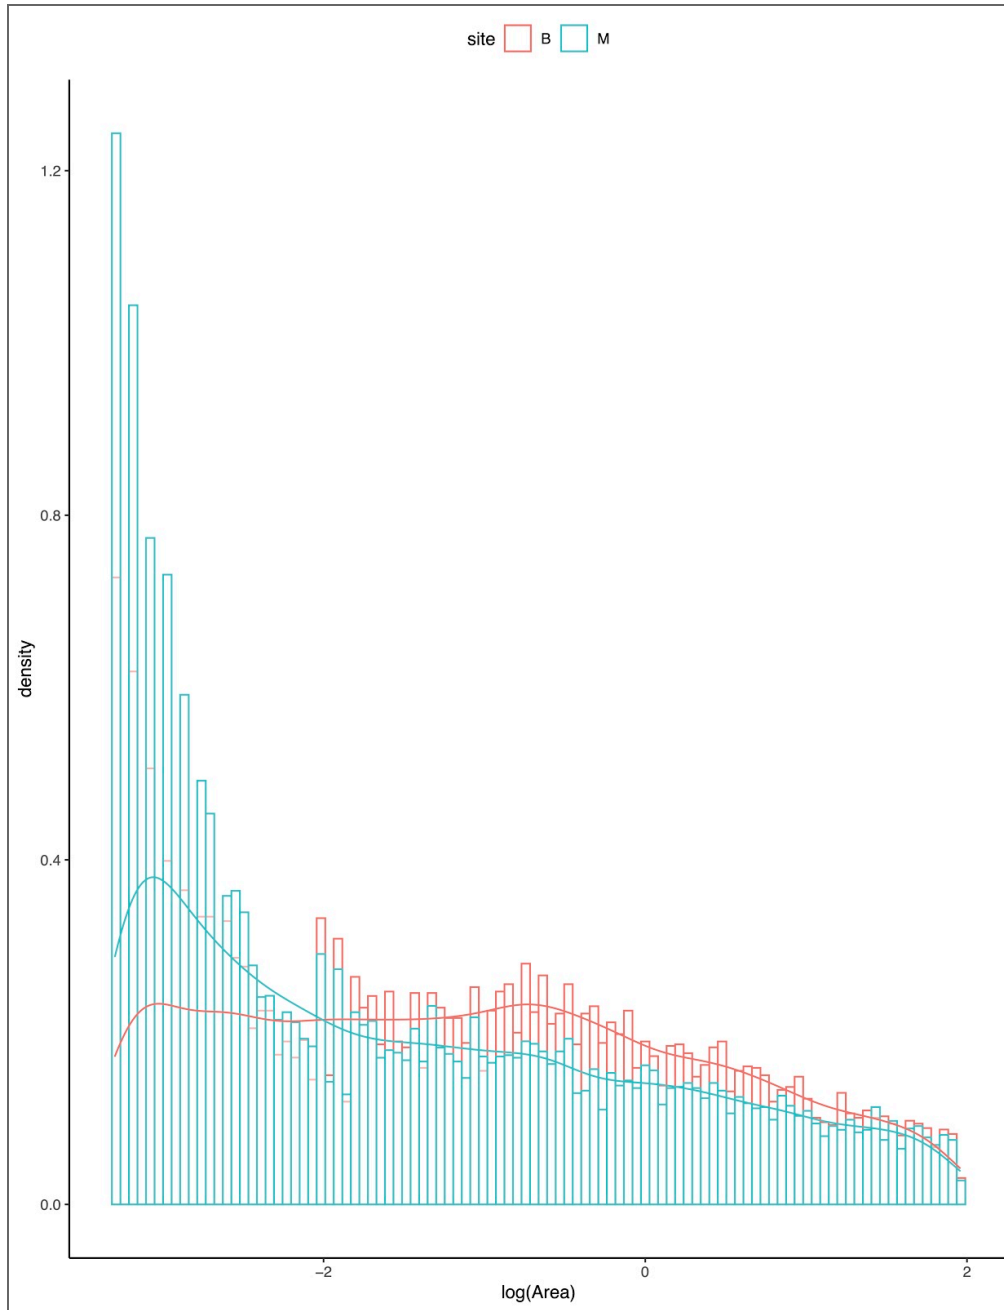

**Supplemental Figure 1.** Distribution of the (log) area across ~270K field of views (FOVs) from 60 images of reef water from Bellairs and Maycocks. We observe an enrichment of small organisms at Maycocks.

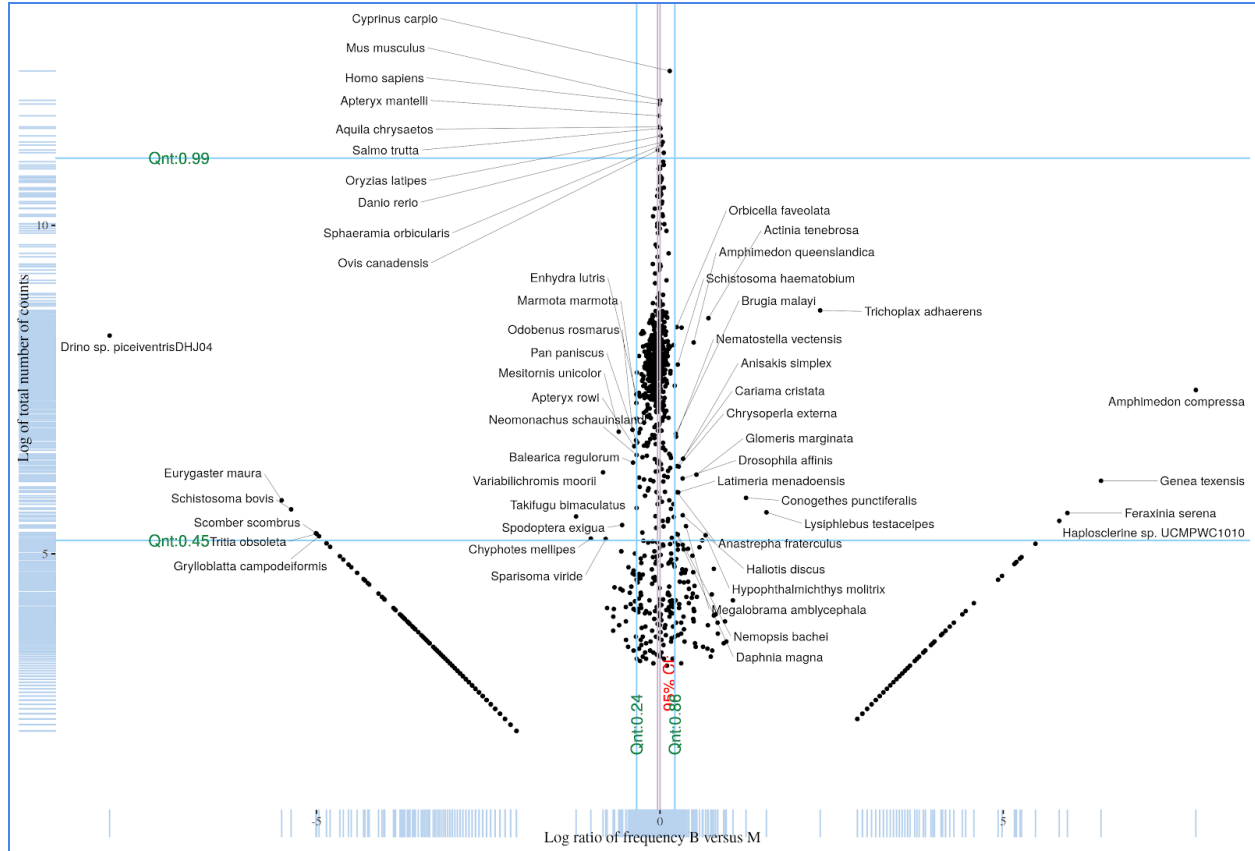

**Supplemental Figure 2.** The distribution of Metazoan species. Here the x-axis corresponds to the log ratio of the fraction of reads mapped to a species at Bellairs (relative to the total number of reads mapped to Metazoa at Bellairs) versus the fraction of reads mapped to a species at Maycocks (relative to the total number of Metazoan reads at Maycocks). The y-axis is the log-sum of reads across both sites. Blue lines denote quantiles. The red lines denote a 95% bootstrap confidence interval for the mean of the distribution. The “v shape” in the lower left and right quadrants correspond to taxa identified uniquely at Maycocks and Bellairs respectively.

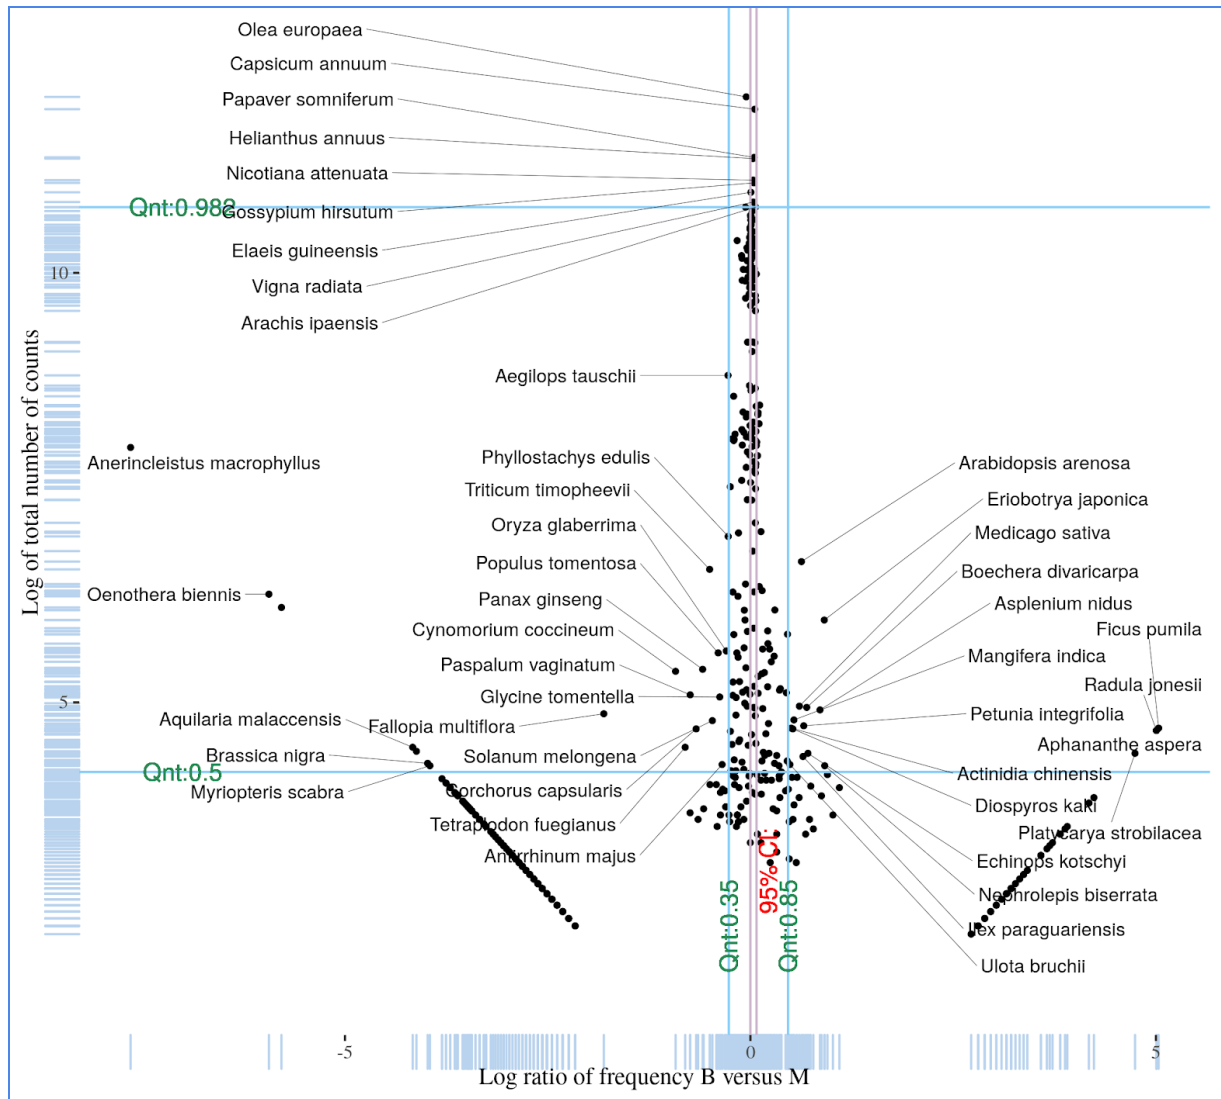

**Supplemental Figure 3.** The distribution of Embryophyta species. Here the x-axis corresponds to the log ratio of the fraction of reads mapped to a species at Bellairs (relative to the total number of reads mapped to Metazoa at Bellairs) versus the fraction of reads mapped to a species at Maycocks (relative to the total number of Embryophyta reads at Maycocks). The y-axis is the log-sum of reads across both sites. Blue lines denote quantiles. The red lines denote a 95% confidence interval for the mean of the distribution.

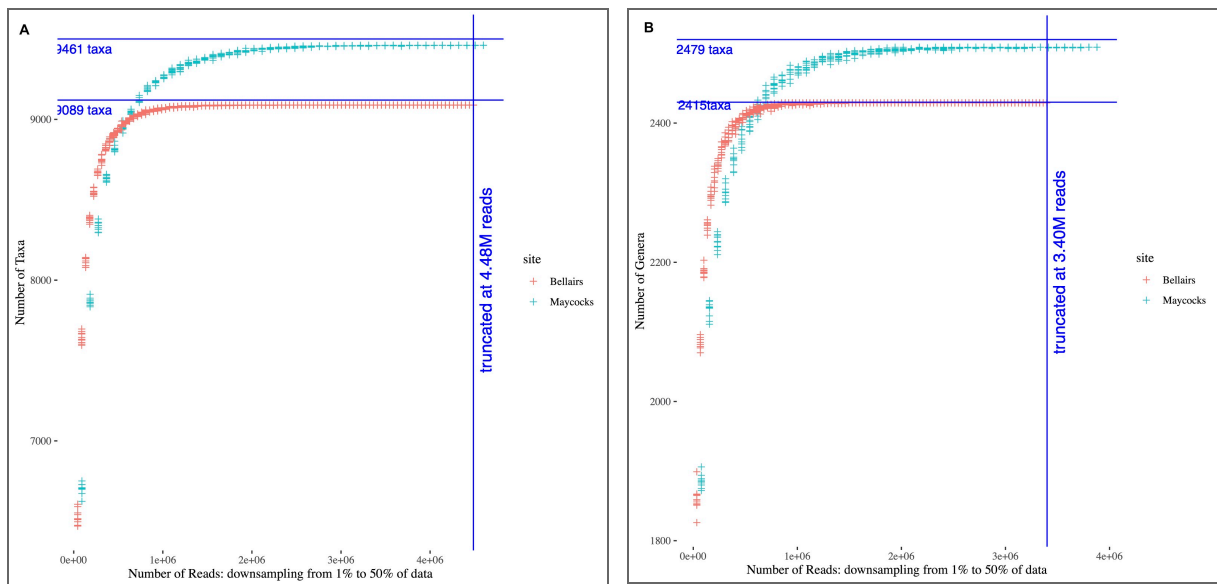

**Supplemental Figure 4 A.** Downsampling of the paired-end reads highlighting the number of species identified. **B.** Downsampling of the paired end-reads highlighting the number of genera identified.



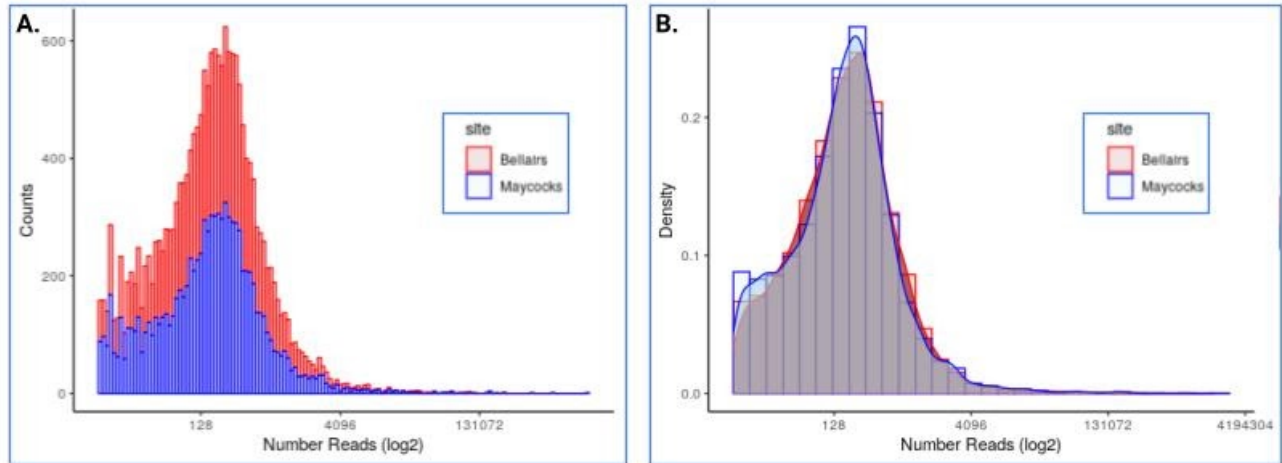

**Supplemental Figure 5.** **A** The estimated number of species at both sites versus the log number of reads. **B** is the corresponding histogram of frequencies.

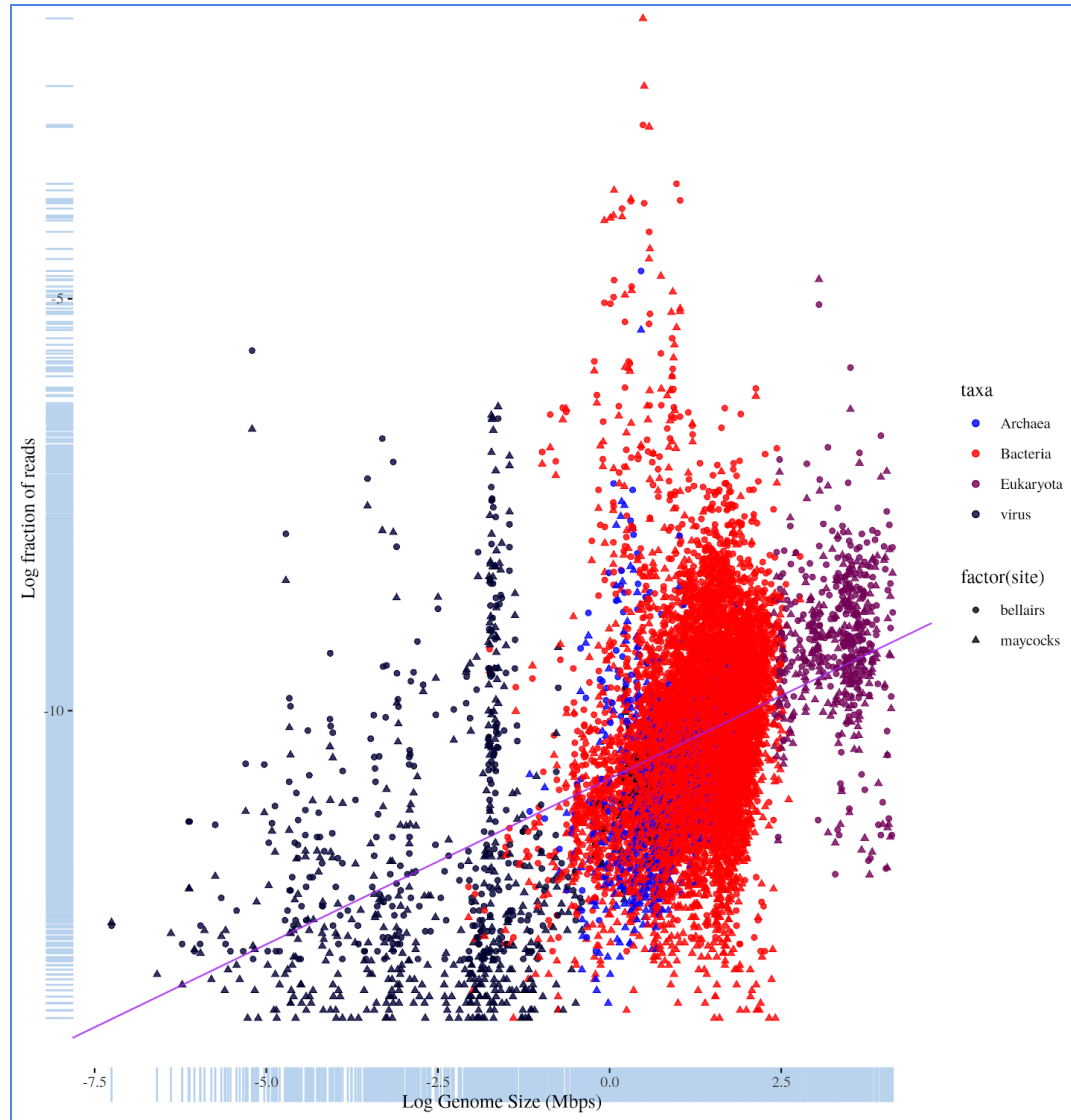

**Supplemental Figure 6.** The relationship between genome size and number of reads mapped to the genome across all domains before correction.

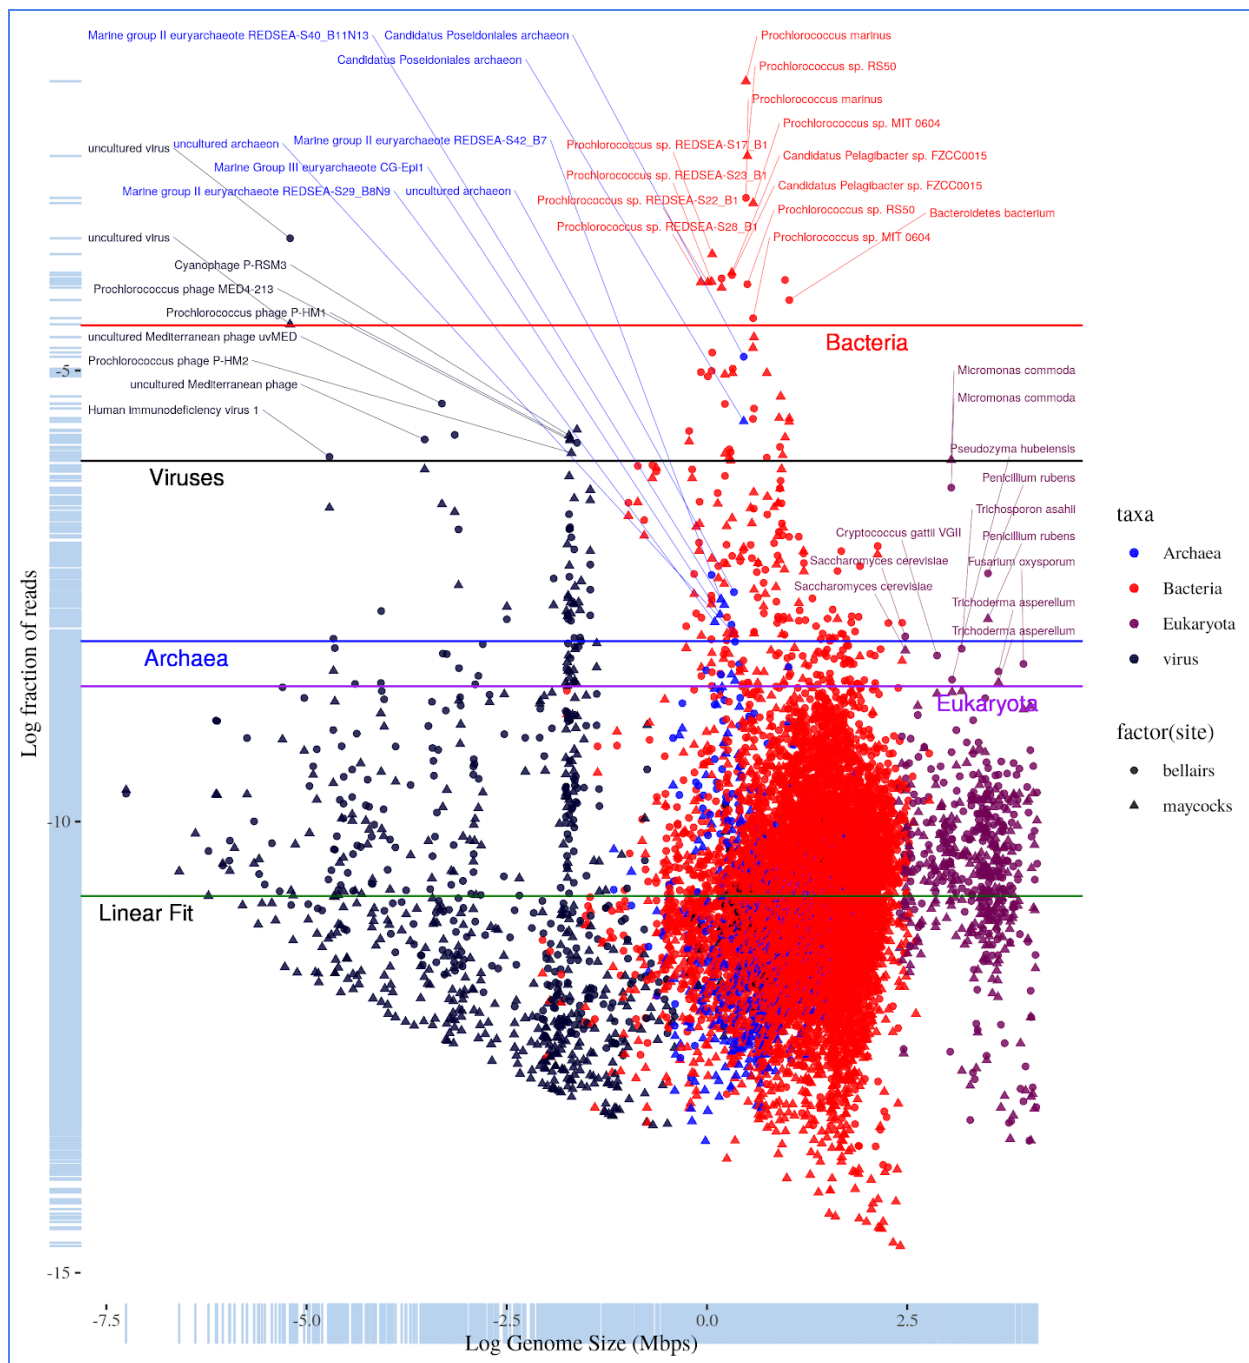

**Supplemental Figure 7.** The relationship between genome size and number of reads mapped to the genome across all species across and all domains after adjusting by the slope obtained from a linear model across all species.

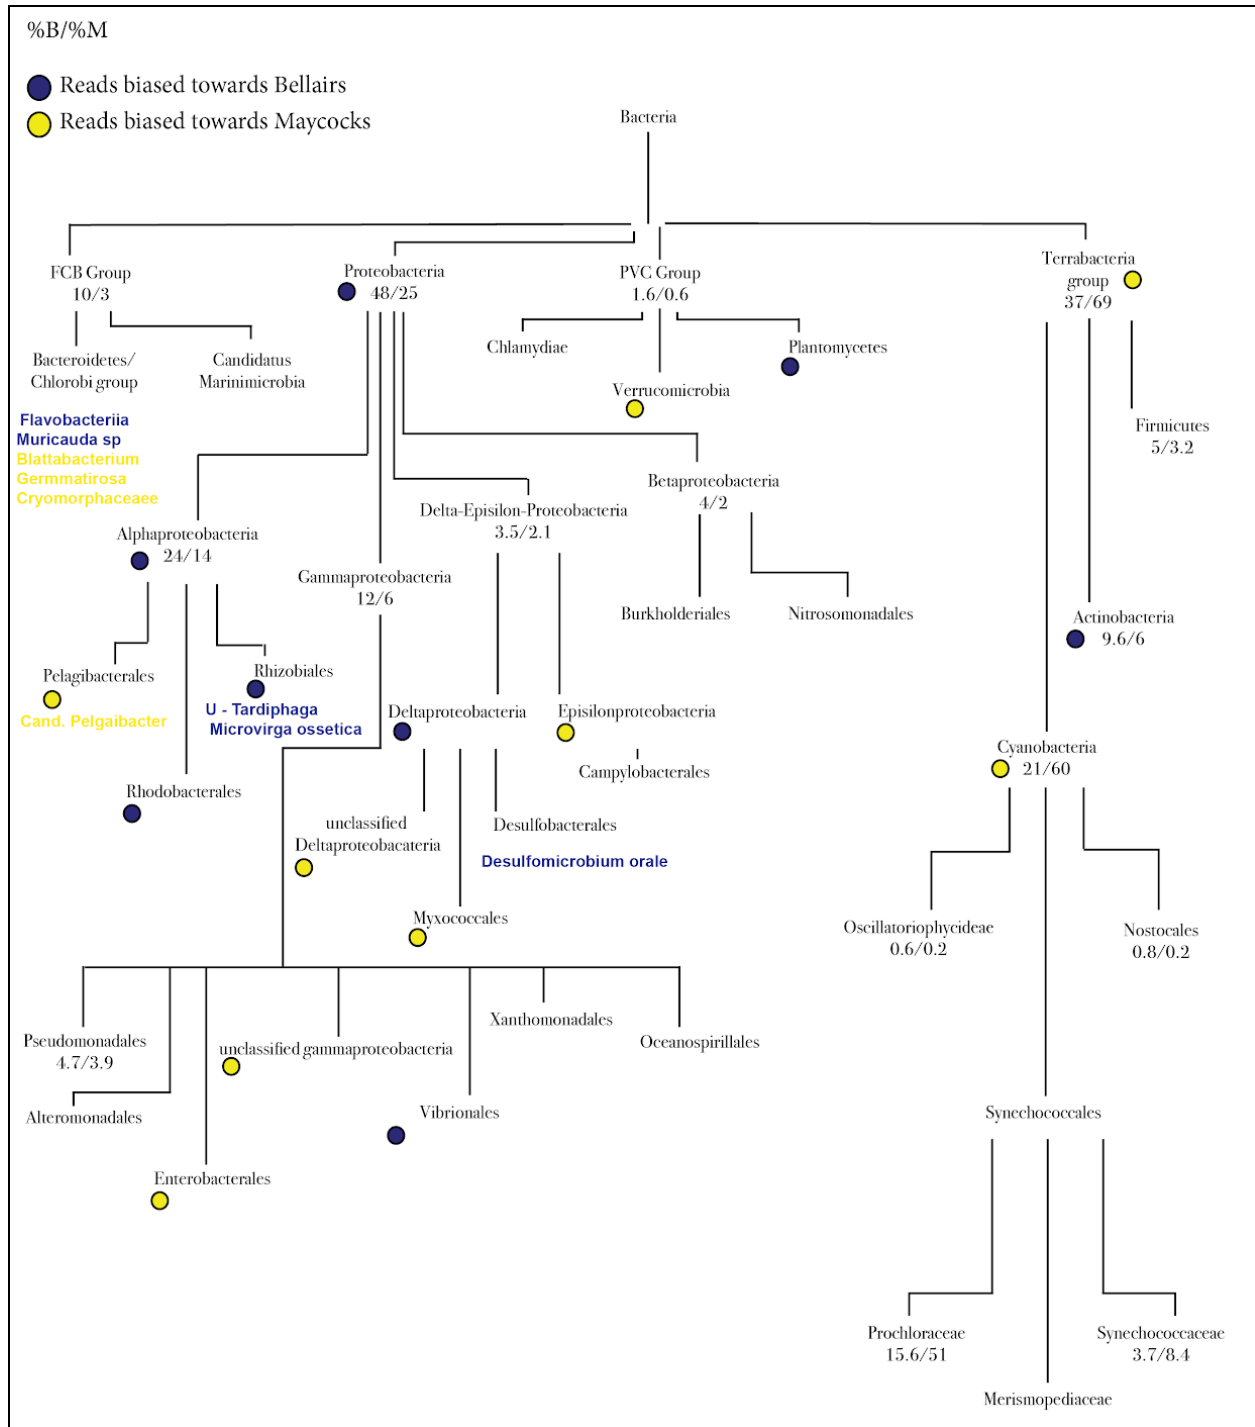

**Supplemental Figure 8. A schematic of the major Bacteria taxa identified at Bellairs and Maycocks.** Here the numbers are the percentage of all bacterial reads mapped to the taxa (B/M). Blue and yellow circles indicate taxa where reads are significantly biased towards Bellairs and Maycocks respectively as determined via the KW test ( $p < 0.01$ ).

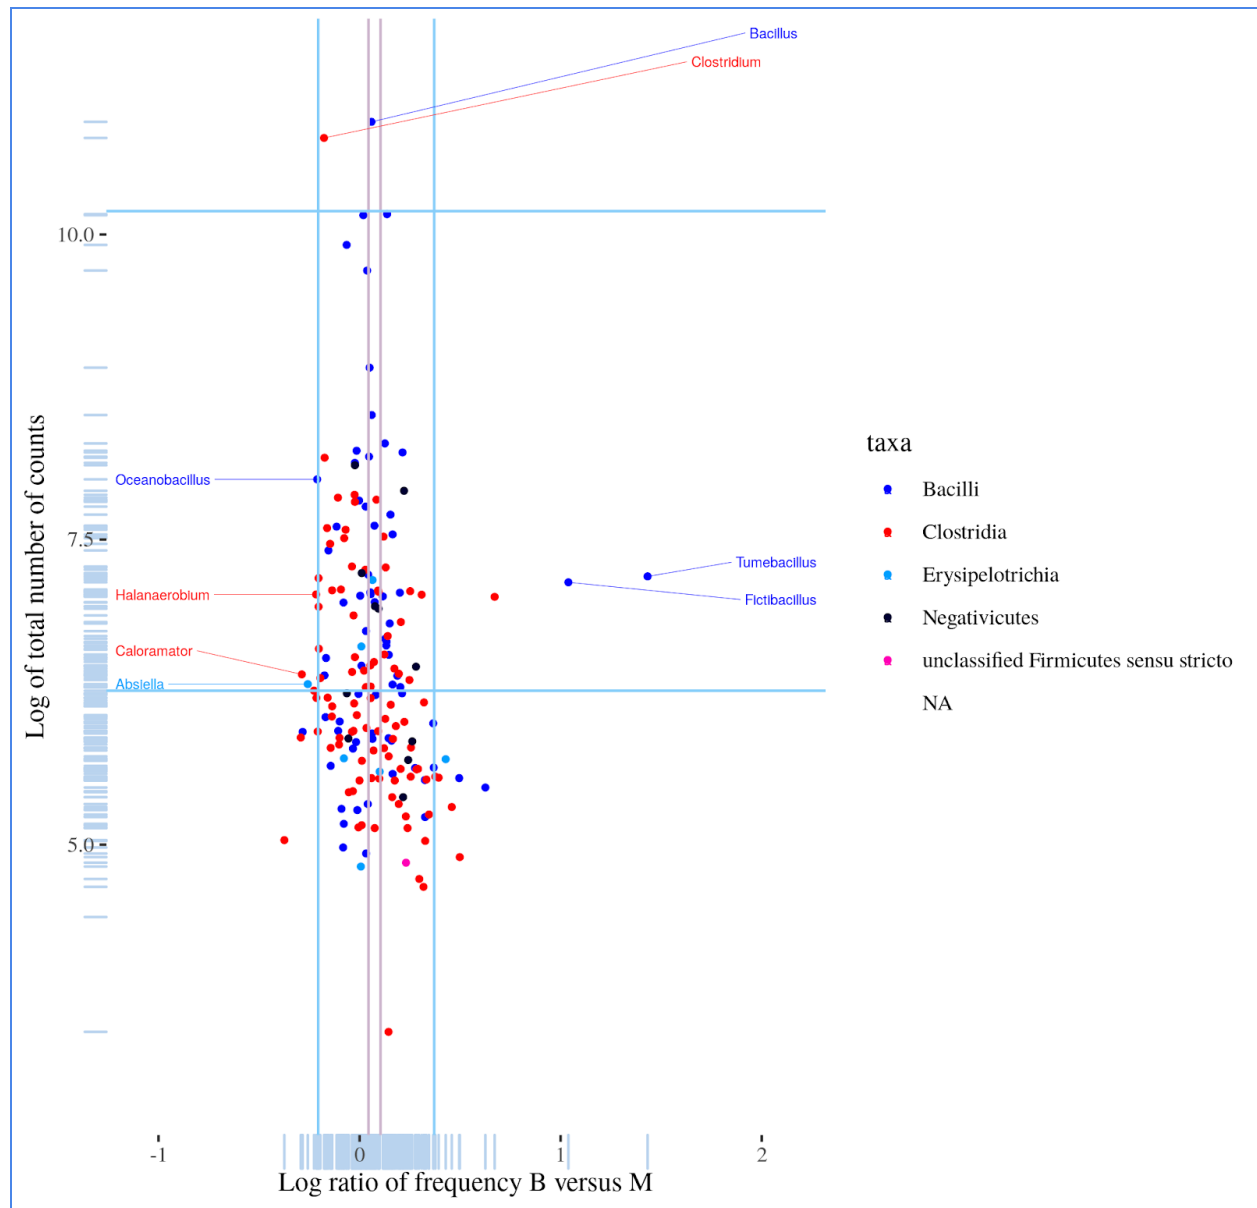

**Supplemental Figure 9.** A log-log scatterplot at the genus level of Firmicutes.

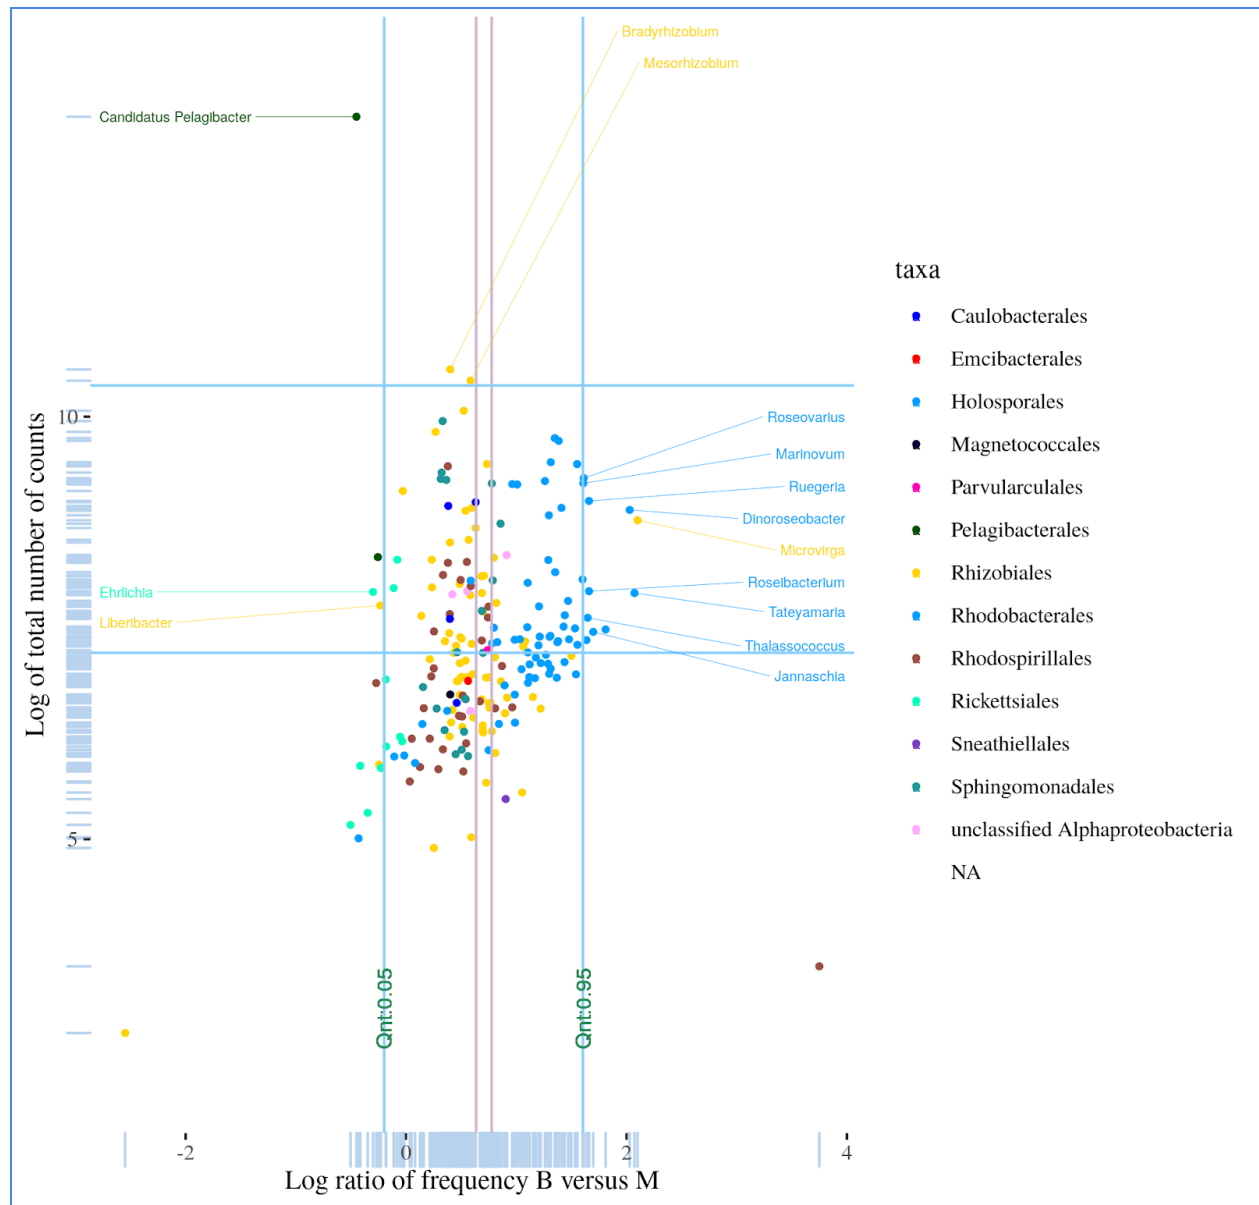

**Supplemental Figure 10.** A log-log scatter plot of the log ratio of reads for all Alphaproteobacteria species versus the total number the total number of reads for the species across all of the bacterial domain but at the genus level.

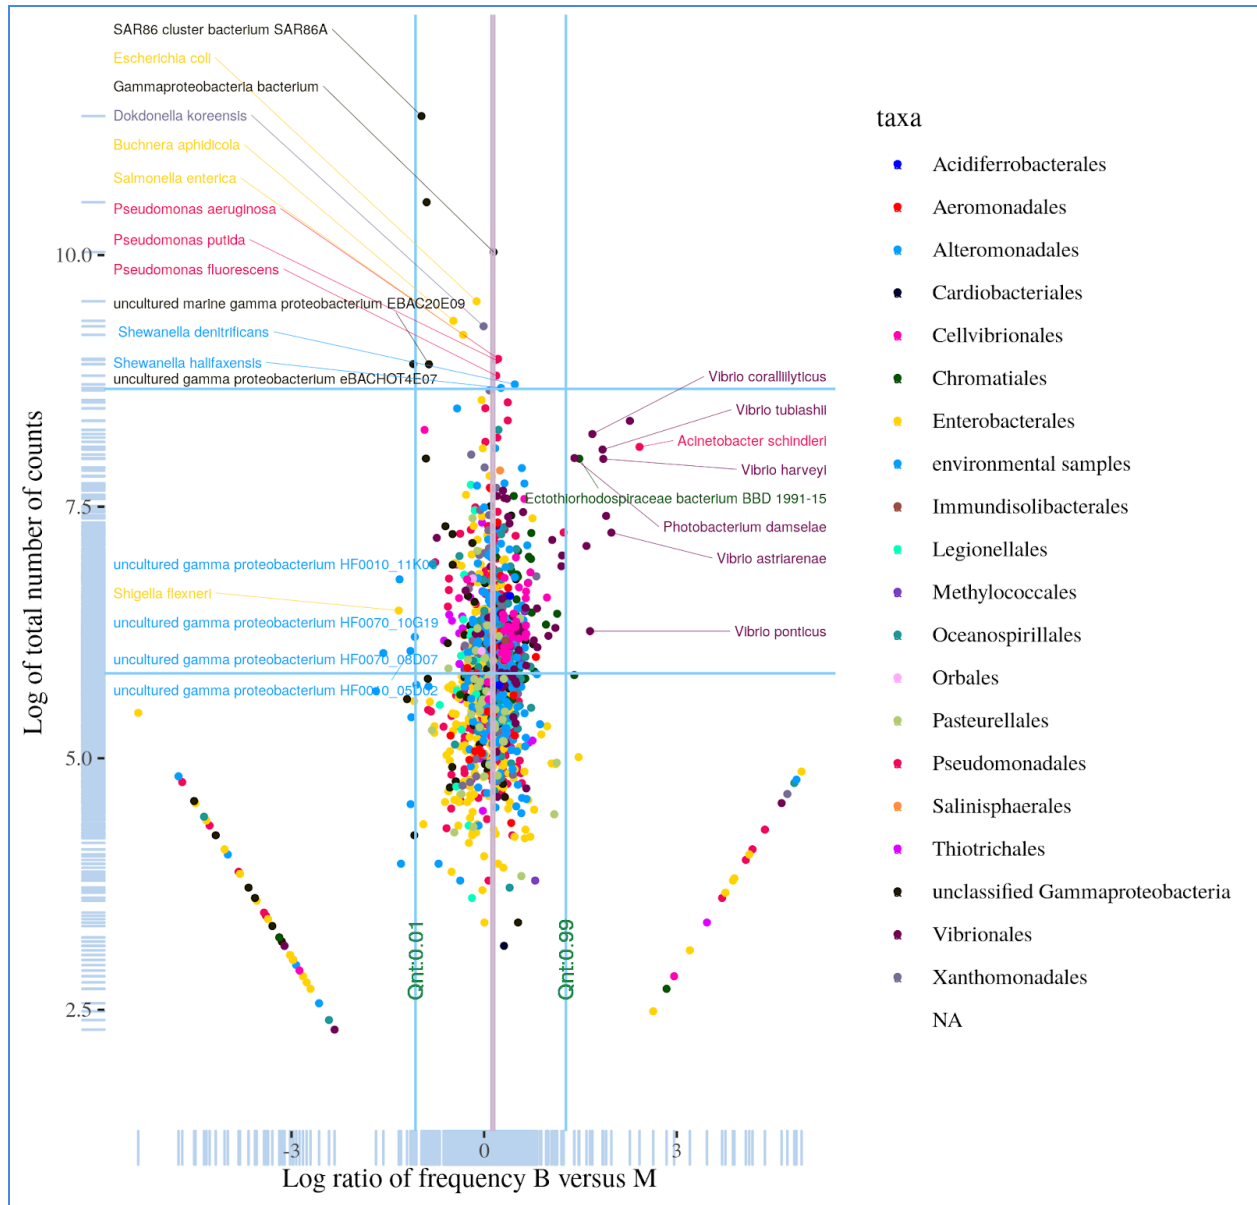

**Supplemental Figure 11.** A log-log scatter plot of the log ratio of reads for all Gammaproteobacteria species versus the total number the total number of reads for the species.



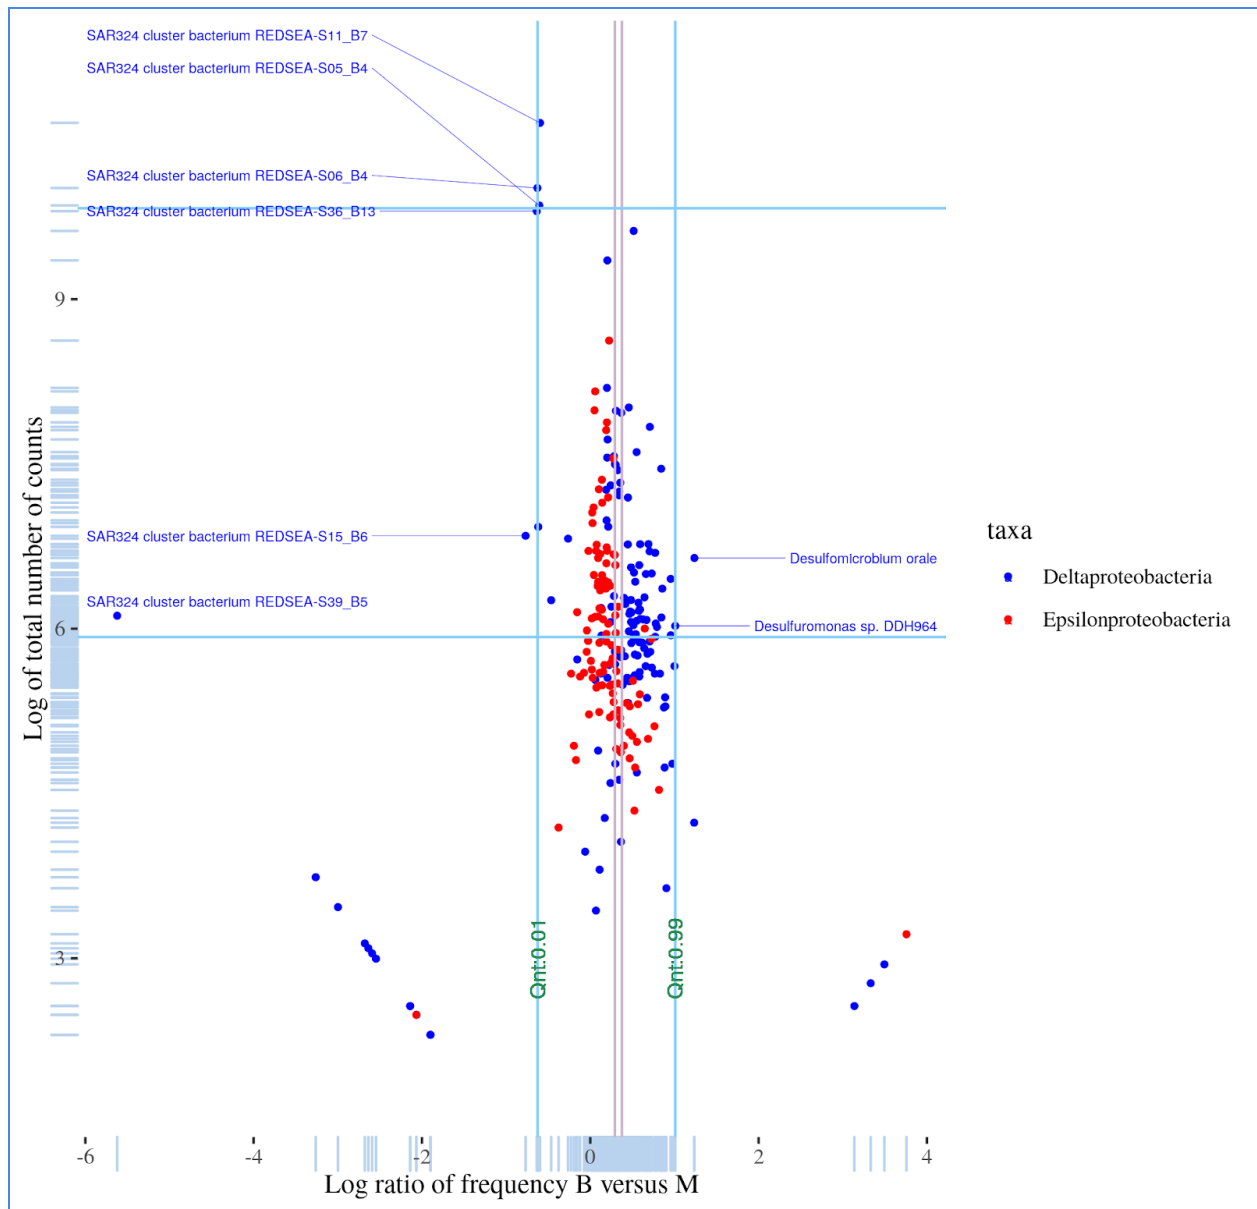

**Supplemental Figure 12.** A log-log scatter plot of the log ratio of reads for all delta-epsilonproteobacterial species versus the total number the total number of reads for the species.

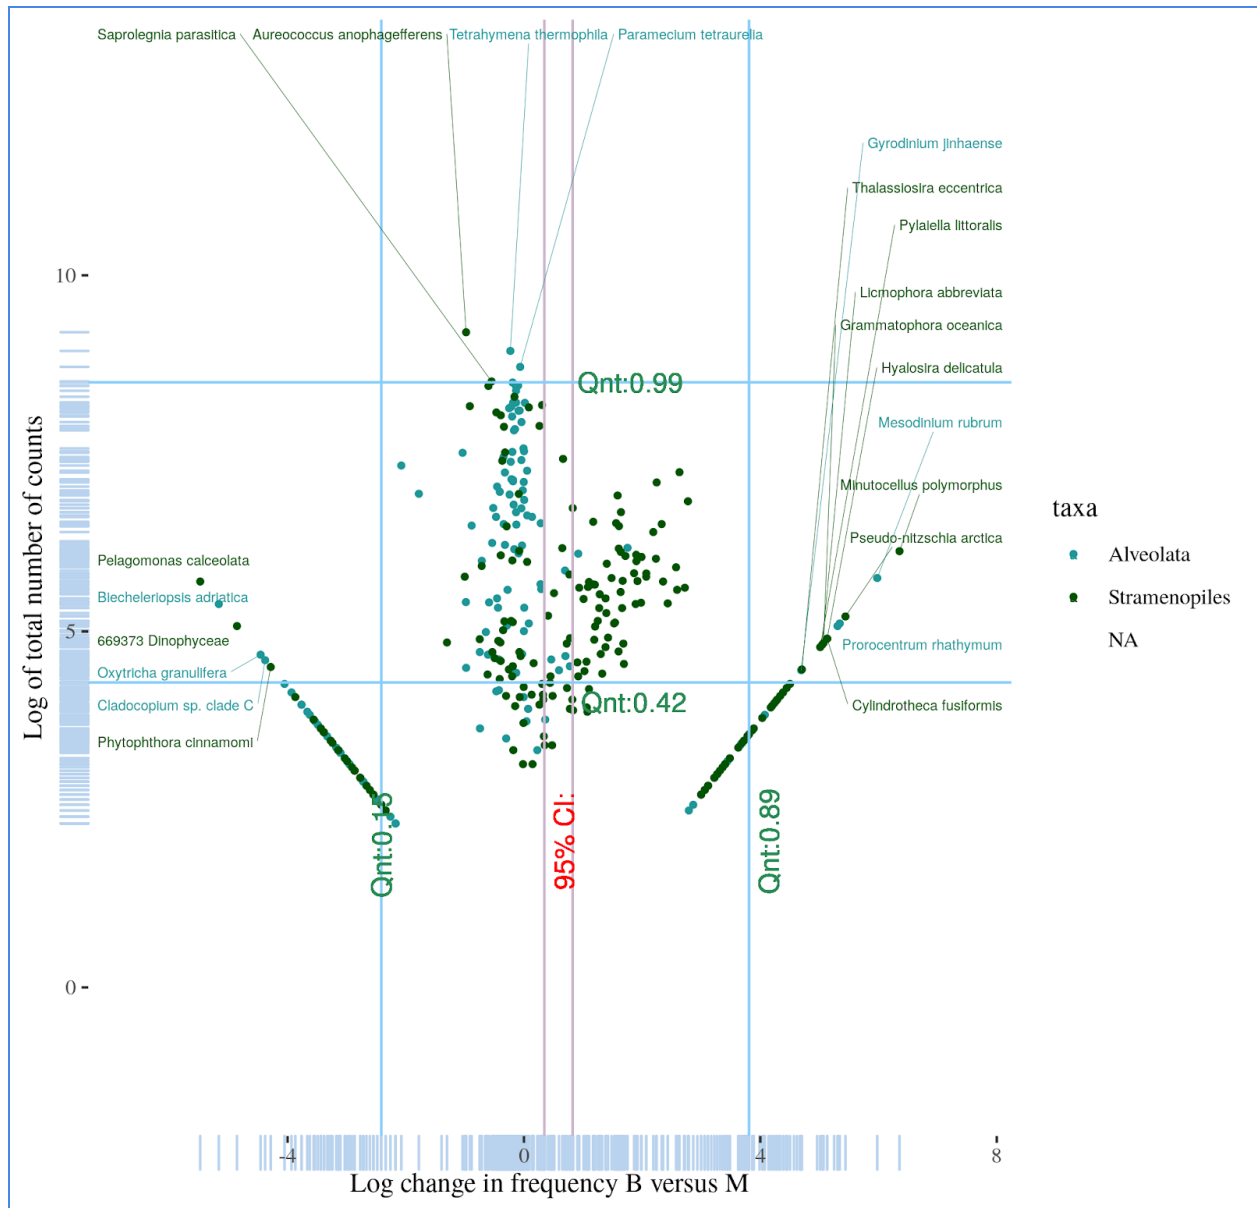

**Supplemental Figure 13.** A log-log scatter plot of the log ratio of reads for all SAR species versus the total number the total number of reads for the species.

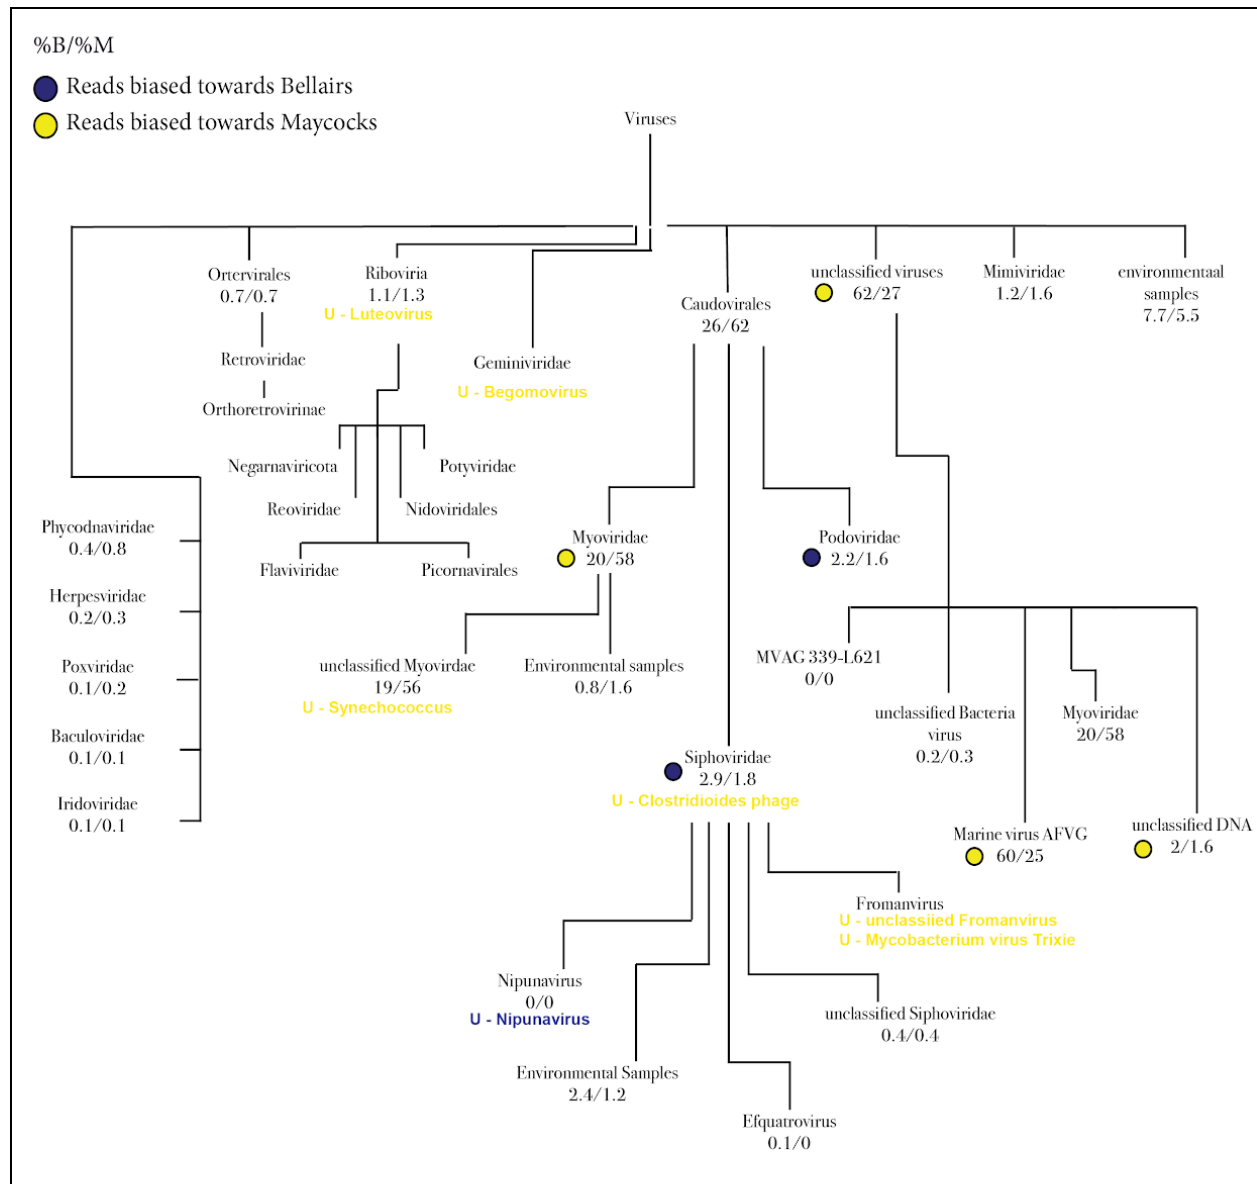

**Supplemental Figure 14 Schematic of the major taxa identified at Bellairs and Maycocks.** Here the numbers are the percentage of all eukaryota reads mapped to the taxa (B/M). Blue and yellow circles indicate taxa where reads are significantly biased towards Bellairs and Maycocks respectively as determined via the KW test ( $p < 0.01$ ). Species uniquely identified at a given site are denoted in blue for Bellairs and yellow for Maycocks.

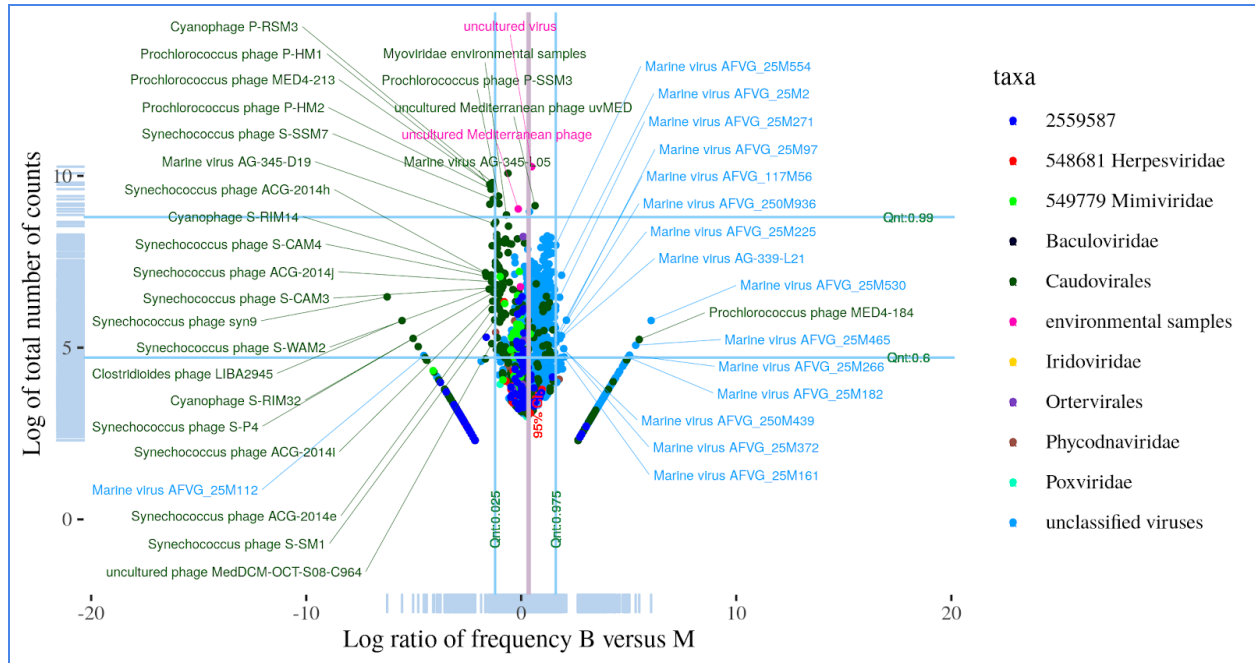

**Supplemental Figure 15.** A log-log scatter plot of the log ratio of reads for all viruses versus the total number the total number of reads for the virus.

## Supplemental Information 1 - Profiling captured environmental DNA

Although our samples were filtered to remove large cells, we nevertheless observed reads mapping to non-microbial taxa such as Metazoa, Embryophyta, and multicellular fungi. The genomes of these organisms tend to be orders of magnitude larger in size than Bacteria and Archaeobacteria. Therefore even a few such Eukaryotic cells escaping our filtering would provide a disproportionate amount of gDNA in our samples and garner a significant number of sequencing reads. Before removing these organisms from our analysis, we first asked what taxa were identified at the sites. Trace cells will likely not give accurate estimates of relative frequencies, but the existence of marine and related species likely indigenous to the reef system would provide supporting evidence towards the technical validity of our approach to detect marine species.

Multicellular content: Metazoa are primarily marine-related and often indigenous to Barbados

An examination of Metazoa (**Supplemental Figure 2**) identified several species of fish at both sites including Taki fugu, *Sparisoma viride*, *Latimeria menadoensis*, and *Megalobrama amblycephala*. Although these taxa are indigenous to the Barbadian reef system, most of the remaining species identified did not have a clear link to Barbados, although they remained marine related. We hypothesize that very few reads mapped to very large genomes were not sufficient to reliably differentiate between lower levels in the tree of life. For example several other species of fish were identified including carp, salmon and atlantic mackerel. Several corals (eg *Orbicella faveolata* and *Porites lobata*), Cnidaria (*Nematostella vectensis*, *Hydractinia symbiolongicarpus*), sponges (*Amphimedon queenslandica*), tunicates (*Halocynthia roretzi*) shrimp (*Macrobrachium nipponense*), a tunicate (*Oikopleura doica*), a sea snail (*Haliotis discus*), a water flea (*Daphnia magna*), the tortoise bug (*Eurygaster master*), several species of (marine) worms, and many basal free-living multicellular Eukaryota (eg *Trichoplax adhaerens*). Both sites had DNA from nematodes, snakes, insects (including several species of flies) and birds. Both sites had a significant number of reads mapped to human, green monkey (an old world primate common across the island), sheep, possum, and rock hyrax. The latter two species have close evolutionary relatives distributed across the island. Reads mapped to several non-indigenous marine mammals, especially at the Maycocks site including seal, walrus. Reads from all Metazoa were removed from our dataset, the relative frequencies of all taxa were recomputed.

Multicellular content: Embryophyta correspond to marine, crop or ornamental plants common to the island

An examination of the multicellular Embryophyta (**Supplemental Figure 3**) identified several marine-related species including flowers (*Papaver somniferum*, *Helianthus annuus*) and trees. We stress again that the genomes of these taxa are very large but contribute just trace amounts of DNA to our samples. The number of reads is likely insufficient to identify the precise species or genera of tree. However, we did identify coastal salt-tolerant plants including *Cynomorium coccineum* and *Paspalum vaginatum* in the Maycocks sample, consistent with the observation that Maycocks has retained a wild grassy beach whereas the Bellairs beaches is adjacent to a

research institute and hotels. The presence of *Paspalum vaginatum* on the island was reported recently and is likely associated with the development of golf courses<sup>1</sup>. DNA that may have originated from agricultural crops directly inland from Maycocks were detected including wheat/rich (*Triticum timopheevii*, *Oryza glaberrima*), ginseng (*Panax ginseng*), bamboo (*Phyllostachys edulis*), and jute (*Corchorus capsularis*). Several species were identified only at Bellairs including climbing fig (*Ficus pumila*), loquat (*Eriobotrya Japonica*), Platycarya tree (*Platycarya strobilacea*), tropical fern (*Nephrolepis biserrata*) and the muku tree (*Aphanthe aspera*). Other than the tropical fern (*Nephrolepis biserrata*) these species could not be directly identified as being present on shore at Bellairs. Some plant species that can be found on the shore of bellairs include West Indian mahogany (*Swietenia mahagoni*), flamboyant tree (*Delonix regia*), yellow-flamboyant (*Peltophorum pterocarpum*), Macarthur palm (*Ptychosperma macarthurii*) golden cane palm (*Dypsis lutescens*), manchineel tree (*Hippomane mancinella*), coconut tree (*Cocos nucifera*) and the whistling pine tree (*Casuarina equisetifolia*). Although not directly identified in our analysis some of these plant species that are present on the shore come from similar clades and orders of the species identified only at Bellairs. The species *C. equisetifolia* belongs to the Order Fagales of which *P. strobilacea* is also a member. While species *S. mahagoni*, *D. regia*, *P. pterocarpum*, *H. mancinella* belong to the Rosids clade of which *E. japonica* and *A. aspera* are members of. We note that sequencing at the Bellairs site produced far fewer overall reads than Maycocks. Therefore, even for a rare species, it is unlikely to be detected at Bellairs but not at Maycocks. After removing these taxa, we also removed reads mapped to several multicellular fungi and algae, in addition to plasmids and artificial sequences.

#### Supplemental Information 2: Richness, diversity and handling zeros

Biodiversity can be measured in many different ways including taxonomic diversity (the presence of different species), phylogenetic diversity (the presence of different evolutionary lineages), or functional diversity (the variety of growth forms and resource use strategies)<sup>2</sup>. *Abundance* refers to the fraction of each species at a site, and since we are in CoDa setting, this is inherently a relative abundance. Diversity is a measure of the distribution of these abundances. Throughout this manuscript we use the Shannon index as our measure of diversity<sup>3</sup> with a permutation based approach to estimate p-values

$$H' = - \sum_{t \in T} p_t \cdot \ln p_t$$

where  $T$  is the vector of relative abundance for all taxa and  $p_t$  is the probability of taxa  $t$ . Briefly, there is an increase in the Shannon index (entropy) as the distribution of abundances approaches a “flat” uniform distribution, and decreased entropy as the frequency of one (or a few species) approaches one.

*Richness* is defined as the number of species within a specified clade at a site. We asked if there was a difference in richness between Bellairs and Maycocks. However, we must first adjust for the fact that Maycocks and Bellairs had different levels of sequencing coverage. More specifically, budget and technical limitations imply that the number of draws made by the sequencer from the urn is finite although large. The sequencing coverage (total number of reads) may not be sufficiently large to identify with high probability rare species in the sample. For instance, a species whose DNA contributes only 1 read to an urn with 10M reads is unlikely

to be identified, if the sequencing coverage is only 1M. In our data, we obtained ~4.5M and ~9.2M mappable paired-end reads from Bellairs and Maycocks respectively. Therefore, we expect to identify more taxa in Maycocks than in Bellairs due to this reason alone. In other words, species richness increases with sample size, and differences in richness may be due to differences in sample size.

To address this, we first downsampled from the Illumina paired-end reads from 1-50%, and counted the number of identified species and genera (**Supplemental Figure 4**). After only ~3M reads at Maycocks and ~1.5M reads at Bellairs (<1/3 of total in both cases), all taxa have been identified. Maycocks however converges 272 more species (64 more genera) than Bellairs.

Rarefaction provides a second approach to exploring this issue. A statistical correction is computed that estimates the number of taxa we would have observed at the sites if we had sequenced Maycocks to the same coverage as Bellairs. To rarefy samples from N to n total reads, we used the rarefy function in the vegan package<sup>4</sup>. In particular, we extrapolated the number of species at each site individually and also with pooled data using the `prestondistr` function to estimate the log-normal fit, and the `veilespec` function to estimate the integral fitted with `prestondistr`. Consistent with your downsampling approach, this statistic suggested that no change in the number of identified species. This suggests our sequencing coverage is sufficient for all but the most extremely rare organisms.

In ecological communities including marine, most species are rare<sup>5</sup>. Preston argued that this implies that richness would follow a truncated log normal distribution (Preston 1948). This is true for the relative frequencies obtained for our data as depicted in **Supplemental Figure 5**. This allows us to estimate the theoretical richness at both sites, the so-called Preston veil<sup>4,6</sup>. Specifically, by integrating the fitted log-normal, the Preston veil speculates how long the right tail is if we had infinite sequencing data. However, consistent with the analysis above, the Preston veil did not predict any new species would have been identified (it predicted 0.28 more species above the 9089 species observed). The results for Maycocks were equally insignificant.

If there is a large difference in the sequencing coverage between sites (as is our case), the presence zeros in the shallower site can have non-intuitive effects on analyses especially with respect to distance measures and clustering. Moreover, CoDa analysis (such as ours here) often relies on log-ratios of the form  $\log \left( \frac{p_{B,t}}{p_{M,t}} \right)$  where  $p_{B,t}$  and  $p_{M,t}$  are the estimates of the frequency of taxa  $t$  at Bellairs and Maycocks respectively. This is referred to as the zero handling problem<sup>7</sup>. We applied a Bayesian-multiplicative replacement strategy that adjusts the count matrix (for all taxa at both sites) in a manner that preserves the ratios between the non-zero components<sup>8</sup>. However, when external datasets (eg Tara Oceans) were included in this analysis with lower sequencing coverage, they had > 50% zeros. We were not able to reach convergence unless we removed taxa. After removing taxa that had zero counts in more than 50% of the samples, we reached convergence but the adjustment had little effect on the data.



### Supplemental Information 3: Correcting for genome size

We asked if there was a correlation between genome size and number of reads aligned to each species across Archaea, Bacteria, Eukaryota and Viruses. The log-log scatterplots of **Supplemental Figure 6** depicts these relationships across all species. Visual inspection suggests a correlation between log genome size and log read count as expected. To adjust for this effect, we fit a simple linear model of the form

$$\log(f_{s,t}) \sim \log(g_s) + \varepsilon$$

where  $f_{s,t}$  is the fraction of all reads mapped to taxon  $t$  at site  $s$ , and  $g_s$  is the genome size (Mbp) for species  $s$ , and  $\varepsilon$  is a normally distributed random variable. An implicit assumption in this simple model is that the vast majority of taxa have approximately the same fraction of read counts  $f_{s,t}$ . The parameters of the fit were then used to correct the observed read counts. Given the compositional nature of our data, any investigations in this manuscript that seek to compare two taxa *within* the same site must first adjust read counts using the linear model.

The corrected relative abundance estimates of all species are depicted in **Supplemental Figure 7**. The adjustments highlight a high abundance of the bacteria *Candidatus Pelagibacter* and *Prochlorococcus*. Several Archaea including the Marine Group II/III and *Cand. Poseidoniales* appear on magnitude below, followed by viruses that infect *Prochlorococcus* and lastly one the Eukaryota *Micromonas commoda* appear.

### Supplemental Information 4: Viruses

Marine viruses affect microbial populations by releasing carbon and nutrients into the ecosystem through lysis, by complexing nutrients such as iron, through reprogramming of host metabolism and horizontal gene transfer, and via the formation of relationships including for example cyanobacteria-cyanophage relationships which affect CO<sub>2</sub> fixation<sup>9-13</sup>. Metagenomic analysis of marine viruses has been investigated including in the context of the Tara Oceans Project<sup>11</sup>. Brum and colleagues isolated organisms below 0.22  $\mu\text{m}$  and built optimized sequencing and bioinformatics platforms specific for the analysis of viromes. Our investigation here is limited, since we selected for organisms between 0.22  $\mu\text{m}$  and 3  $\mu\text{m}$ . Nevertheless, 5.8% (B) and 3.6% (M) of all reads mapped to viruses (**Supplemental Figure 14**). Brum and colleagues also built specialized analytic pipelines; we however use the same pipeline for our preliminary investigations here.

#### Viruses: Bellairs is highly enriched for uncharacterized phages

A large fraction of all viral reads were mapped to virus genomes reported first in a study that developed an assembly-free single molecule nanopore sequencing approach for viruses from environmental samples obtained close to Hawaii<sup>14</sup>. These so-called assembly-free virus genomes (AVGVs) show a clear preference for Bellairs (KW,  $p \ll 0.01$ ). Moreover, the original virus-enriched samples sequenced by Beaulaurier were collected at 25, 117, or 250 meters with  $n=565, 93, 1023$  respectively. The samples from Beaulaurier et al. were filtered to remove all organisms  $> 0.22 \mu\text{m}$ . Of the 14 Marine virus AFVG in the 97.5% percentile across all viruses in

our data (**Supplemental Figure 15**), 11 were harvested at 25 meters. This depth is closest to our samples harvested just below the surface. In Beaulaurier et al, they estimate that 26% of the AFVGs from 25m correspond to cyanophages, 13.3% to SAR11 phages, 12% to SAR116 phages, and 3% to Vibrio phages.

Viruses: Cyanophages are highly enriched at Maycocks, a site highly enriched for cyanobacteria. Consistent with the strong preference for Cyanobacteria (incl. Prochlorococcus and Synechococcus) at Maycocks (26% B vs 62% M), there is a comparably strong preference for cyanophages at Maycocks (KW and Dunn's test for Caudovirales, both  $p \ll 0.01$ , **Supplemental Figure 15**). Consistent with previous findings<sup>15</sup>, Myo-, Siphoviridae- and Podoviridae- viruses are found in our data; these are well established phages for Prochlorococcus and/or Synechococcus.

Viruses: Bellairs is enriched for phages of Pelagibacter

Although the small heterotrophic Pelagibacter, a member of the ubiquitous SAR11 clade, is highly enriched at Maycocks, Podovirus phages of Pelagibacter are systematically shifted towards Bellairs (KW, Dunn's test,  $p \ll 0.01$ ).

Viruses: Bellairs is enriched for plant, animal and algae viruses

Several additional plant, animal and algae viruses were enriched at Bellairs including Negarnaviruses (Canine morbillivirus, Salmon isavirus), Potyviruses (Turnip mosaic virus, Sugarcane mosaic virus), Phycodnaviruses and Iridoviruses.

Viruses: Comparison with the Tara Oceans data

We compared the Shannon index of the Myoviridae, Podoviridae and Giruses against the analogous values reported for the Tara Oceans data<sup>16</sup>. At 11 degrees latitude, Tara Oceans data established the entropy at  $3 \pm 0.2$  for Myoviridae, whereas we report a slightly higher entropy at 3.68 (B) and 3.63 (M). For Podoviridae, Tara Oceans reports  $5 \pm 0.1$ , whereas we have a much smaller entropy at 2.94 (B and M). The giant viruses (giruses) have an entropy of  $5.5 \pm 0.1$  in the Tara Oceans data. As a working definition for viruses, we included any virus specus to the nucleocytoviricota clade. In our data the Shannon index is much lower at 3.19 (B) and 3.2 (M).

## References

1. McGroary, P. C., Cisar, J. L., Giblin-Davis, R. M., Ruiz, O. F. & Nangle, E. J. First Report of Plant-Parasitic Nematodes on Seashore Paspalum (*Paspalum vaginatum*) in Barbados. *Plant Dis.* **98**, 1018 (2014).
2. Le Bagousse-Pinguet, Y. *et al.* Phylogenetic, functional, and taxonomic richness have both

- positive and negative effects on ecosystem multifunctionality. *Proc. Natl. Acad. Sci.* **116**, 8419–8424 (2019).
3. Tucker, C. M. *et al.* A guide to phylogenetic metrics for conservation, community ecology and macroecology: A guide to phylogenetic metrics for ecology. *Biol. Rev.* **92**, 698–715 (2017).
  4. Oksanen, J. *et al.* *vegan: Community Ecology Package*. (2019).
  5. Darwin, C. *On the Origin of the Species by Means of Natural Selection, or the Preservation of Favoured Races in the Struggle for Life*. (John Murray, 1859).
  6. Magurran, A. *Measuring Biological Diversity*. (Blackwell Scientific, 2004).
  7. Quinn, T. P. *et al.* A field guide for the compositional analysis of any-omics data. *GigaScience* **8**, giz107 (2019).
  8. Martín-Fernández, J. A., Palarea-Albaladejo, J. & Olea, R. A. Dealing with Zeros. in *Compositional Data Analysis* (eds. Pawlowsky-Glahn, V. & Buccianti, A.) 43–58 (John Wiley & Sons, Ltd, 2011). doi:10.1002/9781119976462.ch4.
  9. Breitbart, M. Marine viruses: truth or dare. *Annu. Rev. Mar. Sci.* **4**, 425–448 (2012).
  10. Breitbart, M., Bonnain, C., Malki, K. & Sawaya, N. A. Phage puppet masters of the marine microbial realm. *Nat. Microbiol.* **3**, 754–766 (2018).
  11. Brum, J. R. *et al.* Patterns and ecological drivers of ocean viral communities. *Science* **348**, 1261498–1261498 (2015).
  12. Suttle, C. A. Marine viruses — major players in the global ecosystem. *Nat. Rev. Microbiol.* **5**, 801–812 (2007).
  13. Bonnain, C., Breitbart, M. & Buck, K. N. The Ferrojan Horse Hypothesis: Iron-Virus Interactions in the Ocean. *Front. Mar. Sci.* **3**, (2016).
  14. Beaulaurier, J. *et al.* Assembly-free single-molecule sequencing recovers complete virus

genomes from natural microbial communities. *Genome Res.* **30**, 437–446 (2020).

15. Xiao, X., Zeng, Q., Zhang, R. & Jiao, N. Prochlorococcus viruses—From biodiversity to biogeochemical cycles. *Sci. China Earth Sci.* **61**, 1728–1736 (2018).

16. Ibarbalz, F. M. *et al.* Global Trends in Marine Plankton Diversity across Kingdoms of Life. *Cell* **179**, 1084-1097.e21 (2019).
